# Supplementary material for: Liver fibrosis prevalence and risk factors in patients with psoriasis: A systematic review and meta-analysis
Source: PubMed Central journal article supplement (PMC9797863; doi:10.3389/fmed.2022.1068157), 2022-12-15
Supplement: Data_Sheet_1.pdf [file Data_Sheet_1.pdf]

**Supplementary Figure 1:** Forrest plots for pooled prevalence psoriasis of high risk of advanced liver fibrosis subgrouped based on (A) continent, (B) non-invasive tests, and (C) methotrexate user percentage

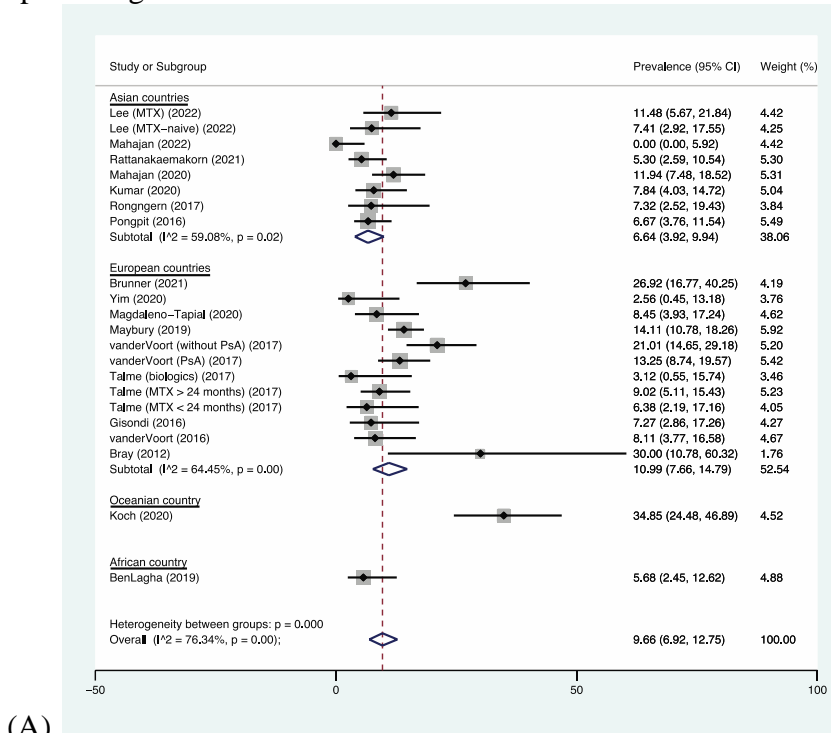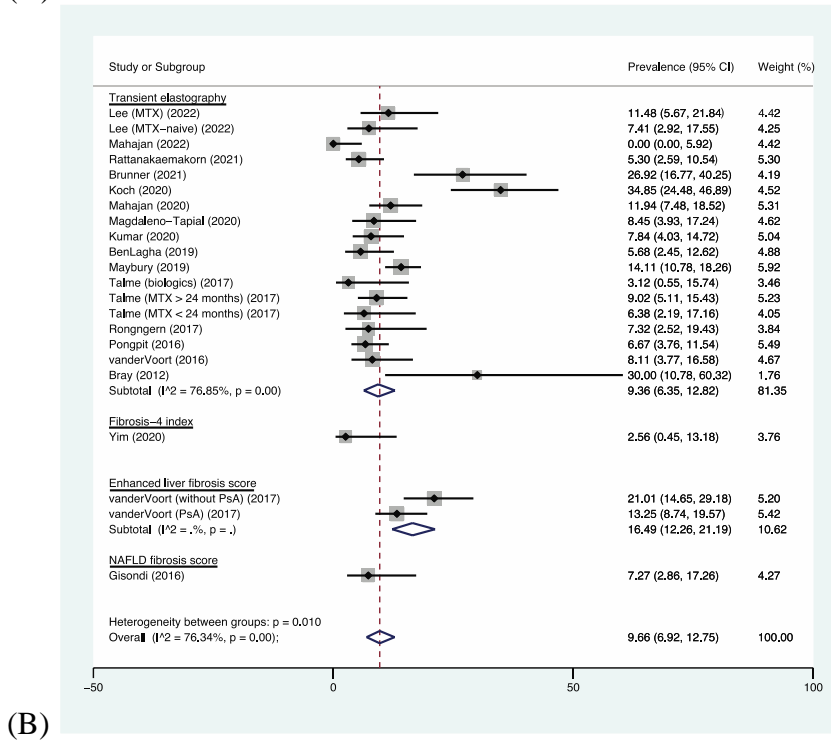

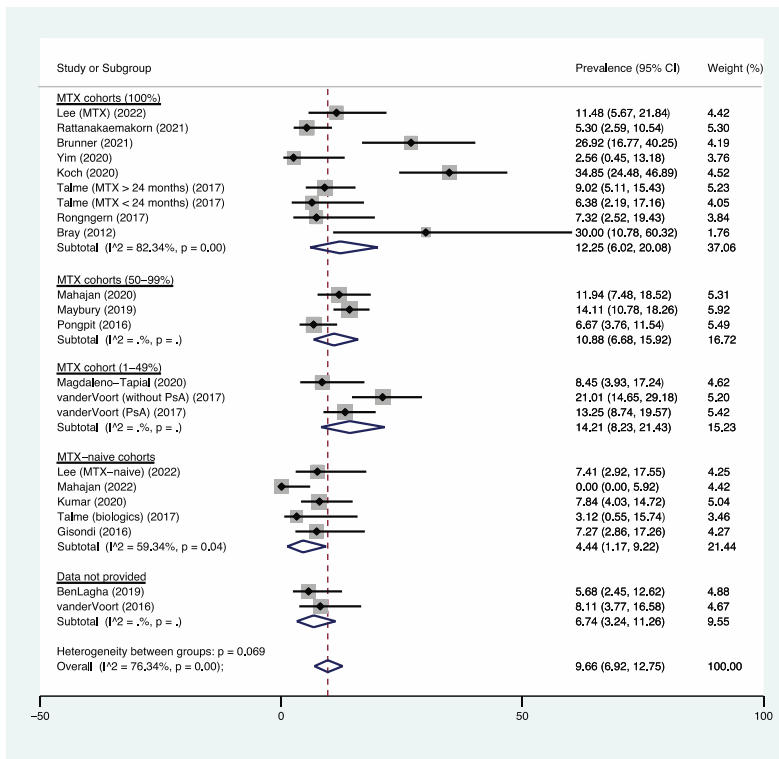

(C)

**Supplementary Figure 2:** Forrest plots for pooled prevalence psoriasis of low risk of advanced liver fibrosis subgrouped based on (A) continent, (B) non-invasive tests, and (C) methotrexate user percentage

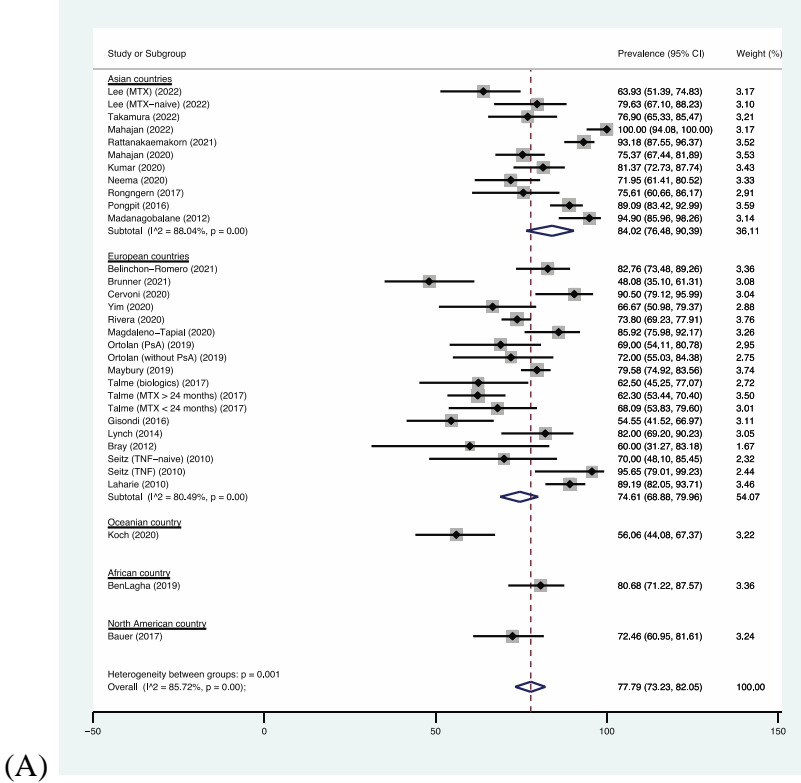

(A)

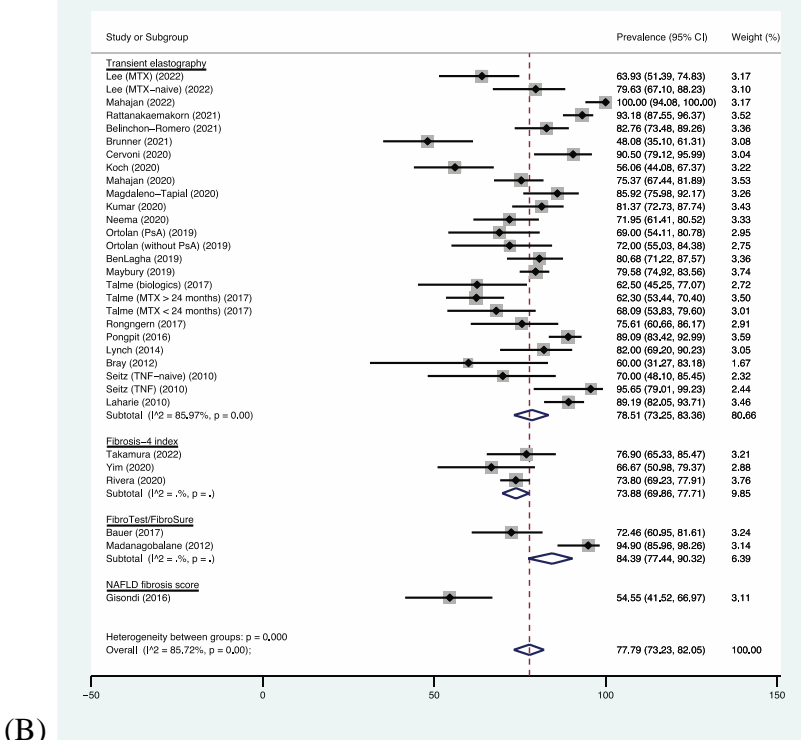

(B)

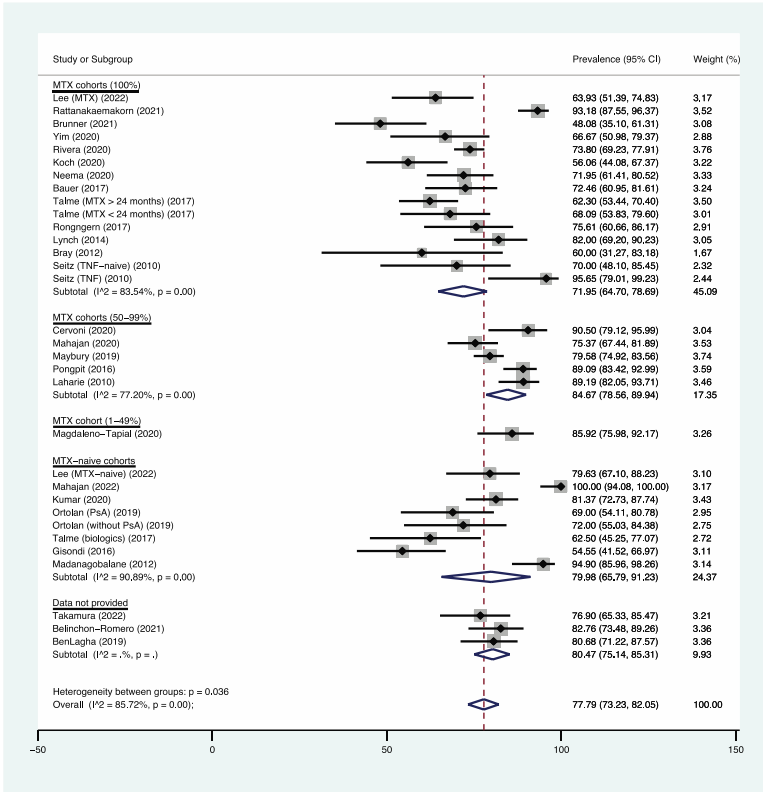

(C)

**Supplementary Figure 3:** Forrest plots of pooled odds ratios for the association of variables with liver fibrosis; (A) age (B) male (C) PASI > 10 (D) Psoriatic arthritis (E) Cumulative MTX dose > 1500 mg (F) BMI>30 (G) DM (H) HT (I) DLP (J) Metabolic syndrome

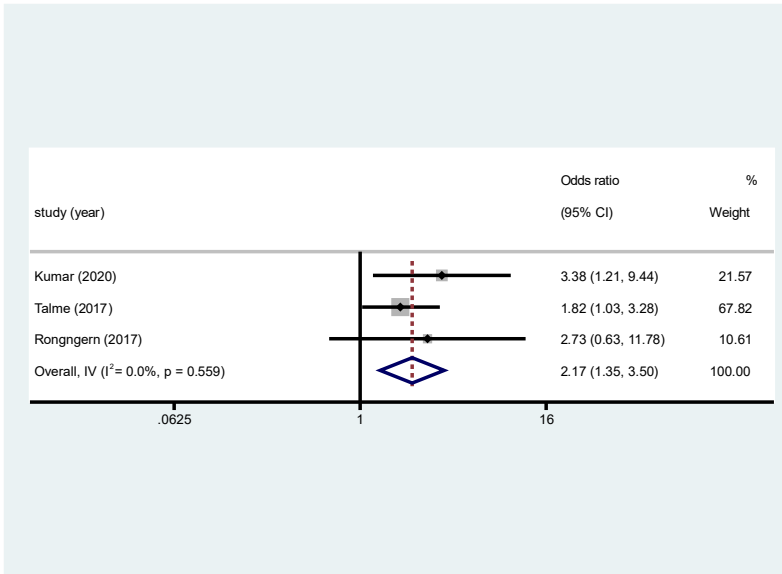

(A)

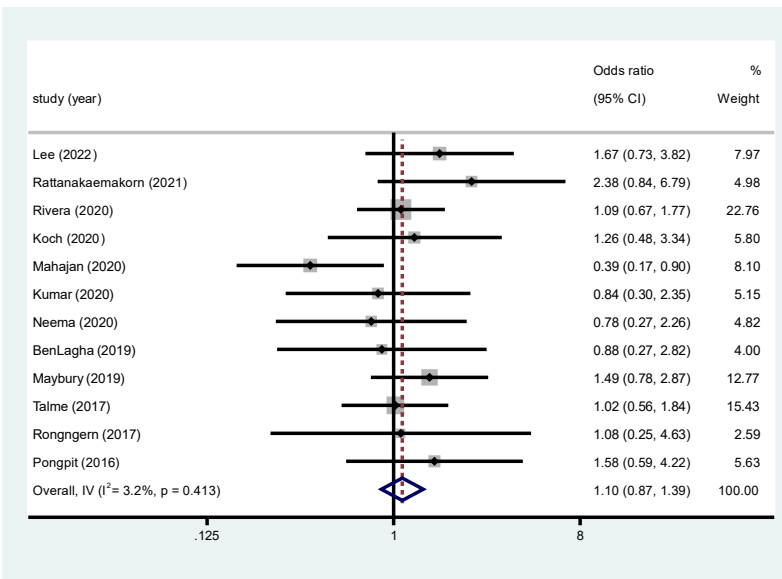

(B)

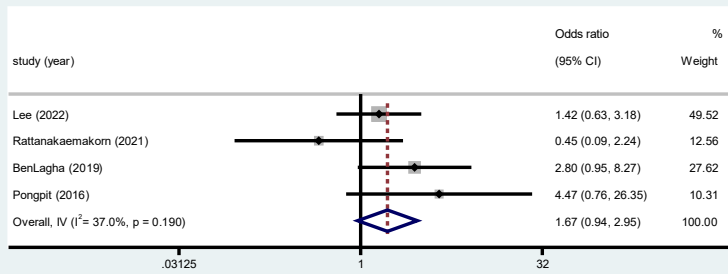

(C)

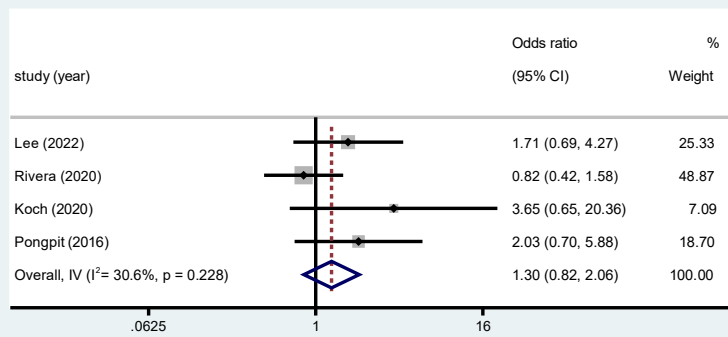

(D)

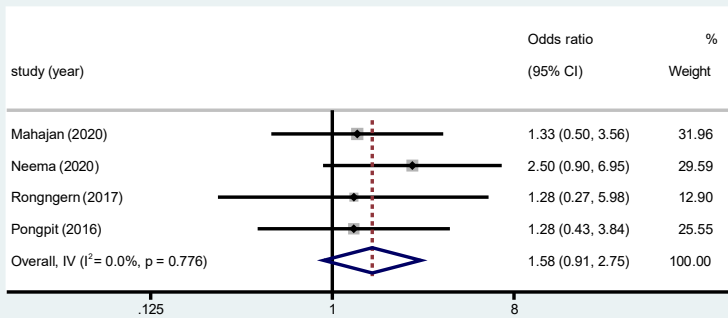

(E)

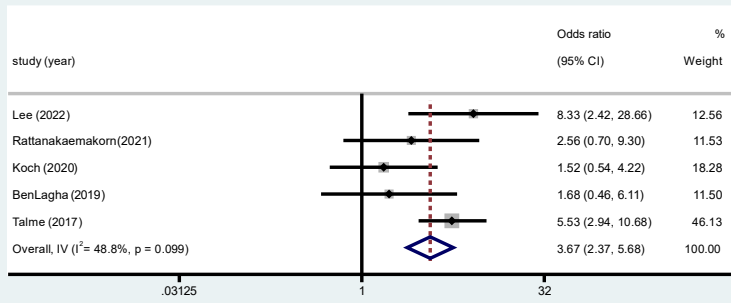

(F)

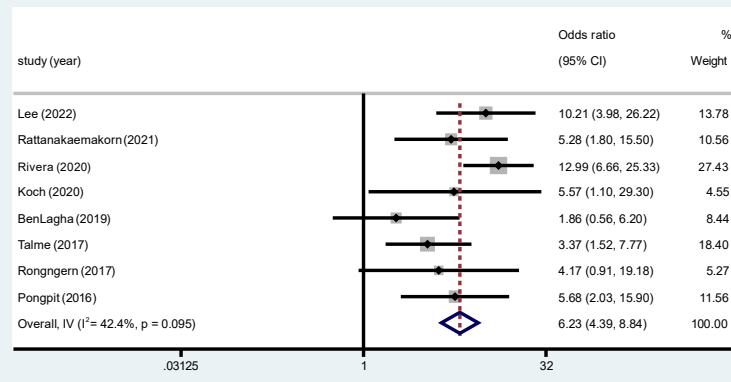

(G)

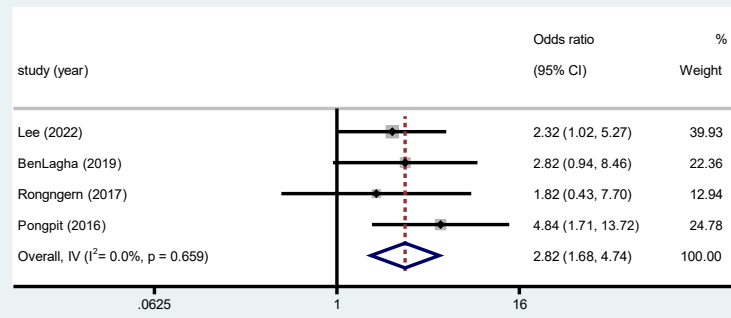

(H)

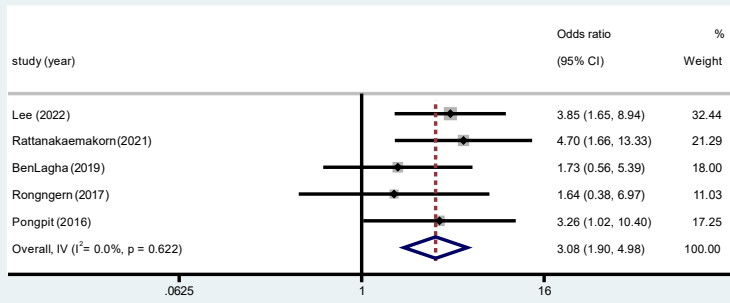

(I)

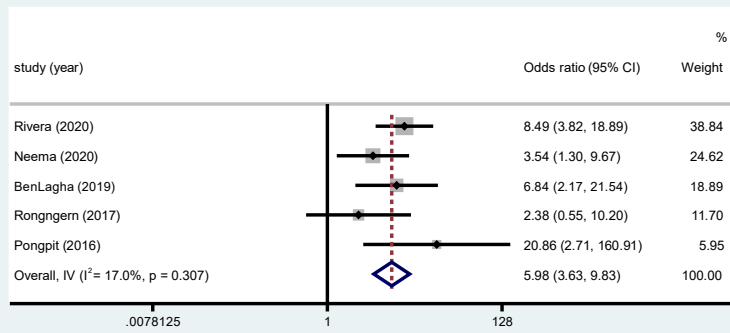

(J)
