# Supplementary material for: Liver fibrosis prevalence and risk factors in patients with psoriasis: A systematic review and meta-analysis
Source: PubMed Central journal article supplement (PMC9797863; doi:10.3389/fmed.2022.1068157), 2022-12-15
Supplement: Table_1.pdf [file Table_1.pdf]

**Supplementary Table 1: Search strategy**

|                         |                                                                                                                                                                                                                                                               |
|-------------------------|---------------------------------------------------------------------------------------------------------------------------------------------------------------------------------------------------------------------------------------------------------------|
| <b>PubMed</b>           | ("Psoriasis"[Mesh] OR "Arthritis, Psoriatic"[Mesh] OR psoria*) AND ("Liver Diseases"[Mesh] OR "Liver Cirrhosis"[Mesh] OR "End Stage Liver Disease"[Mesh] OR "Fatty Liver"[Mesh] OR "hepatic fibrosis")                                                        |
| <b>Embase</b>           | <ol style="list-style-type: none"> <li>1. 'psoriasis'/exp OR psoriasis</li> <li>2. 'liver'/exp OR liver</li> <li>3. 'fibrosis'/exp OR fibrosis</li> <li>4. 'cirrhosis'/exp OR cirrhosis</li> <li>5. 2 AND 3</li> <li>6. 4 OR 5</li> <li>7. 1 AND 6</li> </ol> |
| <b>Scopus</b>           | ( TITLE-ABS-KEY ( psoria* ) AND TITLE-ABS-KEY ( ( liver AND fibrosis ) OR ( hepatic AND fibrosis ) OR ( cirrho* ) OR ( fatty AND liver ) ) )                                                                                                                  |
| <b>Cochrane Library</b> | (Psoriasis OR psoria*):ti,ab,kw AND ("Liver fibrosis" OR "hepatic fibrosis" OR cirrho* OR "fatty liver" OR "NAFLD"):ti,ab,kw                                                                                                                                  |
