# Supplementary material for: Liver fibrosis prevalence and risk factors in patients with psoriasis: A systematic review and meta-analysis
Source: PubMed Central journal article supplement (PMC9797863; doi:10.3389/fmed.2022.1068157), 2022-12-15
Supplement: Table_2.pdf [file Table_2.pdf]

**Supplementary Table 2:** Characteristics of included studies

|                |                                                                                                                                                                                                                                                                                                                                                                                                                                                                                                                                                                                                |                                                                                                                                                                                                                                                                                                                                                                                                                                                                |
|----------------|------------------------------------------------------------------------------------------------------------------------------------------------------------------------------------------------------------------------------------------------------------------------------------------------------------------------------------------------------------------------------------------------------------------------------------------------------------------------------------------------------------------------------------------------------------------------------------------------|----------------------------------------------------------------------------------------------------------------------------------------------------------------------------------------------------------------------------------------------------------------------------------------------------------------------------------------------------------------------------------------------------------------------------------------------------------------|
| Lee, 2022 (27) |                                                                                                                                                                                                                                                                                                                                                                                                                                                                                                                                                                                                |                                                                                                                                                                                                                                                                                                                                                                                                                                                                |
| Methods        | <ul style="list-style-type: none"> <li>- Case-control study</li> <li>- Malaysia</li> </ul>                                                                                                                                                                                                                                                                                                                                                                                                                                                                                                     |                                                                                                                                                                                                                                                                                                                                                                                                                                                                |
| Participants   | <p>MTX group (N=61)</p> <ul style="list-style-type: none"> <li>▪ Age 52.98±15.5</li> <li>▪ Female 29 (47.5)</li> <li>▪ Alcohol 5 (8.2)</li> <li>▪ Diabetes 13 (21.3)</li> <li>▪ Hypertension 27 (44.3)</li> <li>▪ Dyslipidemia 25 (41.0)</li> <li>▪ BMI 27.0±6.2</li> <li>▪ Obese 19 (31.1)</li> <li>▪ Duration of psoriasis 11.9±6.7 years</li> <li>▪ PASI score 15.8 (IQR 18.4)</li> <li>▪ Psoriatic arthritis 19 (31.1)</li> <li>▪ MTX cumulative dose ≥1 g; 1-1.5 gm = 5 (8.2%), 1.5-3 gm = 27(44.3%), 3-4.5 gm = 17 (27.8%), &gt;4.5 gm = 12 (19.7%).</li> <li>▪ NAFLD 6 (9.8)</li> </ul> | <p>MTX-naive group (N=56)</p> <ul style="list-style-type: none"> <li>▪ Age 52.2±15.1</li> <li>▪ Female 24 (42.9)</li> <li>▪ Alcohol 5 (8.9)</li> <li>▪ Diabetes 18 (32.1)</li> <li>▪ Hypertension 23 (41.1)</li> <li>▪ Dyslipidemia 19 (33.9)</li> <li>▪ BMI 26.7±5.0</li> <li>▪ Obese 14 (25.0)</li> <li>▪ Duration of psoriasis 10.4±9.4 years</li> <li>▪ PASI score 4.3 (IQR 6.6)</li> <li>▪ Psoriatic arthritis 8 (14.3)</li> <li>▪ NAFLD 0 (0)</li> </ul> |
| Investigations | <ul style="list-style-type: none"> <li>▪ TE, FIB-4, APRI</li> </ul>                                                                                                                                                                                                                                                                                                                                                                                                                                                                                                                            |                                                                                                                                                                                                                                                                                                                                                                                                                                                                |
| Outcomes       | <p>MTX group</p> <ul style="list-style-type: none"> <li>- TE &lt;6.5 kPa = 39 (63.9)</li> <li>- FIB-4 &lt;1.45 = 48 (78.7)</li> <li>- APRI &lt;0.7 = 54 (88.5)</li> <li>- TE &gt;11.5 kPa = 7 (11.5)</li> <li>- FIB-4 &gt;3.25 = 2 (3.3)</li> <li>- APRI &gt;1.0 = 5 (8.2)</li> </ul>                                                                                                                                                                                                                                                                                                          | <p>MTX-naive group</p> <ul style="list-style-type: none"> <li>- TE &lt;6.5 kPa = 45 (80.4)</li> <li>- FIB-4 &lt;1.45 = 46 (82.1)</li> <li>- APRI &lt;0.7 = 49 (87.5)</li> <li>- TE &gt; 11.5 kPa = 4 (7.1)</li> <li>- FIB-4 &gt; 3.25 = 2 (3.6)</li> <li>- APRI &gt;1.0 = 6 (10.7)</li> </ul>                                                                                                                                                                  |
|                | <ul style="list-style-type: none"> <li>- Obesity adjusted OR 8.26 (1.73-39.43)</li> <li>- Diabetes adjusted OR 30.35 (7.52-122.42)</li> <li>- MTX use with deranged ALT adjusted OR 68.56 (8.26-568.86)</li> </ul>                                                                                                                                                                                                                                                                                                                                                                             |                                                                                                                                                                                                                                                                                                                                                                                                                                                                |
| Comments       |                                                                                                                                                                                                                                                                                                                                                                                                                                                                                                                                                                                                |                                                                                                                                                                                                                                                                                                                                                                                                                                                                |

| Mahajan, 2022 (30) |                                                                                                                                                                                                                                                                                                                                                                                                                                                                                                                                                                                                                                                                                                                                                                             |
|--------------------|-----------------------------------------------------------------------------------------------------------------------------------------------------------------------------------------------------------------------------------------------------------------------------------------------------------------------------------------------------------------------------------------------------------------------------------------------------------------------------------------------------------------------------------------------------------------------------------------------------------------------------------------------------------------------------------------------------------------------------------------------------------------------------|
| Methods            | <ul style="list-style-type: none"> <li>- Cross-sectional, case-control study</li> <li>- India</li> </ul>                                                                                                                                                                                                                                                                                                                                                                                                                                                                                                                                                                                                                                                                    |
| Participants       | <ul style="list-style-type: none"> <li>- 61 psoriasis patients</li> <li>- Female 18 (29.5)</li> <li>- Age 47.5±13.8</li> <li>- Duration of psoriasis 3±12.5 years</li> <li>- PASI &lt;6/6-12/&gt;12 = 48(78.7)/9(14.7)/4(6.5)</li> <li>- Psoriatic arthritis 4 (6.5)</li> <li>- Pregnant and lactating women and patients with erythroderma, having history of addictions, systemic medications that can induce fatty liver (methotrexate, retinoids, antiretroviral drugs, amiodarone, tamoxifen, corticosteroid, valproic acid), preexisting diabetes mellitus, hypertension, dyslipidemia, hepatitis B or hepatitis C virus infection, hepatic or renal disease, morbid obesity (body mass index [BMI] &gt;30 kg/m<sup>2</sup>), or malignancy were excluded.</li> </ul> |
| Investigations     | <ul style="list-style-type: none"> <li>- TE</li> </ul>                                                                                                                                                                                                                                                                                                                                                                                                                                                                                                                                                                                                                                                                                                                      |
| Outcomes           | <ul style="list-style-type: none"> <li>- TE &lt;7.6 kPa = 61 (100)</li> </ul>                                                                                                                                                                                                                                                                                                                                                                                                                                                                                                                                                                                                                                                                                               |
| Comments           |                                                                                                                                                                                                                                                                                                                                                                                                                                                                                                                                                                                                                                                                                                                                                                             |

| Takamura, 2022 (28) |                                                                                                                                                                                                                                                                                                                                                                                                                                                                                                                                                                                                                                                                                                                                                  |
|---------------------|--------------------------------------------------------------------------------------------------------------------------------------------------------------------------------------------------------------------------------------------------------------------------------------------------------------------------------------------------------------------------------------------------------------------------------------------------------------------------------------------------------------------------------------------------------------------------------------------------------------------------------------------------------------------------------------------------------------------------------------------------|
| Methods             | <ul style="list-style-type: none"> <li>- Retrospective study</li> <li>- Japan</li> </ul>                                                                                                                                                                                                                                                                                                                                                                                                                                                                                                                                                                                                                                                         |
| Participants        | <ul style="list-style-type: none"> <li>- 65 patients with psoriasis treated with IL-17i</li> <li>- Age 46 (range 40-54.5)</li> <li>- Female 16 (24.6)</li> <li>- BMI 26.3 (range 23.7-29.9)</li> <li>- Psoriasis subtypes Psoriasis vulgaris/psoriatic erythroderma/pustular psoriasis = 42(64.6)/4(6.2)/3(4.6)</li> <li>- Psoriatic arthritis 16(24.6)</li> <li>- Duration of psoriasis 12 (range 5–20) years</li> <li>- PASI 8.7 (4.6–16.4)</li> <li>- PASI &lt;5/5-9/≥10 = 17(26.1)/18(27.7)/30(46.2)</li> <li>- Alcohol intake 0/1-19/20-59/&gt;60/no data = 26(40.0)/3(4.6)/2(3.1)/1(1.5)/33(50.8)</li> <li>- Obesity 43 (66.2)</li> <li>- Diabetes 15 (23.1)</li> <li>- Hypertension 20 (30.8)</li> <li>- Dyslipidemia 9 (13.8)</li> </ul> |
| Investigations      | <ul style="list-style-type: none"> <li>- NFS, FIB-4</li> </ul>                                                                                                                                                                                                                                                                                                                                                                                                                                                                                                                                                                                                                                                                                   |
| Outcomes            | <ul style="list-style-type: none"> <li>- NFS &lt; 1.455 = 75.4%</li> <li>- FIB-4 &lt; 1.3 = 76.9%</li> </ul>                                                                                                                                                                                                                                                                                                                                                                                                                                                                                                                                                                                                                                     |
| Comments            |                                                                                                                                                                                                                                                                                                                                                                                                                                                                                                                                                                                                                                                                                                                                                  |

| Rattanakaemakorn, 2021 (31) |                                                                                                                                                                                                                                                                                                                  |
|-----------------------------|------------------------------------------------------------------------------------------------------------------------------------------------------------------------------------------------------------------------------------------------------------------------------------------------------------------|
| Methods                     | <ul style="list-style-type: none"> <li>- Retrospective cohort study</li> <li>- Thailand</li> </ul>                                                                                                                                                                                                               |
| Investigations              | <ul style="list-style-type: none"> <li>- TE</li> </ul>                                                                                                                                                                                                                                                           |
| Participants                | <ul style="list-style-type: none"> <li>- 132* psoriasis patients who are on MTX with/without acetretin</li> <li>- Age 52±14.1</li> <li>- Female 68(51.5)</li> <li>- BMI 31.51±6.0</li> <li>- PASI 8.38±6.42</li> <li>- Diabetes 23(17.4)</li> <li>- Obesity 53(40.2)</li> <li>- Dyslipidemia 55(41.7)</li> </ul> |
| Outcomes                    | <ul style="list-style-type: none"> <li>- TE &lt; 8 kPa = 123(93.2)</li> <li>- TE ≥ 10 kPa = 7(5.3)</li> <li>- DM adjusted HR 2.40 (1.05–5.51)</li> <li>- Obesity adjusted HR 3.28 (1.18–9.16)</li> <li>- Dyslipidemia adjusted HR 1.73 (0.67-4.47)</li> </ul>                                                    |
| Comments                    | * Patient data was available for re-calculation (patients with viral hepatitis or have history of alcohol use were excluded)                                                                                                                                                                                     |

| Belinchón-Romero, 2021 (32) |                                                                                                                                                                                                                                                                                                                                                                                                                                                                                                                                                                                                                                                                                                                                                                                                                                                                                                                                                                                                                                                                                                                                                                                              |
|-----------------------------|----------------------------------------------------------------------------------------------------------------------------------------------------------------------------------------------------------------------------------------------------------------------------------------------------------------------------------------------------------------------------------------------------------------------------------------------------------------------------------------------------------------------------------------------------------------------------------------------------------------------------------------------------------------------------------------------------------------------------------------------------------------------------------------------------------------------------------------------------------------------------------------------------------------------------------------------------------------------------------------------------------------------------------------------------------------------------------------------------------------------------------------------------------------------------------------------|
| Methods                     | <ul style="list-style-type: none"> <li>▪ Prospective cohort study</li> <li>▪ Spain</li> </ul>                                                                                                                                                                                                                                                                                                                                                                                                                                                                                                                                                                                                                                                                                                                                                                                                                                                                                                                                                                                                                                                                                                |
| Participants                | <p>91 moderate-to-severe psoriasis patients with NAFLD (87 of 91 patients had valid TE results)</p> <ul style="list-style-type: none"> <li>- Female 32 (35.2)</li> <li>- Age 53 (IQR 45.5–61.5)</li> <li>- Duration of psoriasis 20 years (IQR 10–28)</li> <li>- BMI <math>\geq 30</math> or obesity 54 (59.3)</li> <li>- Abnormal waist circumference 8 (8.8)</li> <li>- Smokers 23 (25.3)</li> <li>- Diabetes 23 (25.3)</li> <li>- Cardiopathy 10 (11.0)</li> <li>- Dyslipidemia 57 (62.6)</li> <li>- Metabolic syndrome 54 (59.3)</li> <li>- Psoriatic arthritis 19 (20.9)</li> <li>- PASI 3.4 (IQR 1–8)</li> <li>- BSA 4 (IQR 1-8)</li> <li>- Patients with treatment 29(31.8)</li> <li>- Exclusion criteria; treatment with systemic corticosteroids in the previous 30 days, moderate alcohol consumption (&gt; 3 units of alcohol per day in man or more than 2 units in women), other chronic liver disease (including B or C hepatitis-infected patients, Wilson’s disease, autoimmune hepatitis, primary biliary cirrhosis, primary sclerosant cholangitis or hepatic malignancy), incapacitating disease or cognitive limitation, HIV-infected patients, and pregnancy</li> </ul> |
| Investigations              | <ul style="list-style-type: none"> <li>▪ TE</li> <li>▪ Liver biopsy, FIB-4, NFS (for 13 patients)</li> </ul>                                                                                                                                                                                                                                                                                                                                                                                                                                                                                                                                                                                                                                                                                                                                                                                                                                                                                                                                                                                                                                                                                 |
| Outcomes                    | <ul style="list-style-type: none"> <li>▪ (N=87) TE &lt;7.8 kPa = 72(82.8)</li> <li>▪ DM adjusted OR 5.24 (1.15-23.7)</li> <li>▪ “ALT &gt; 33 U/L” adjusted OR 16.49 (3.15-86.35)</li> <li>▪ “ERS <math>\geq 16</math> mm” adjusted OR 11.93 (2.30-61.95)</li> </ul>                                                                                                                                                                                                                                                                                                                                                                                                                                                                                                                                                                                                                                                                                                                                                                                                                                                                                                                          |
| Comments                    |                                                                                                                                                                                                                                                                                                                                                                                                                                                                                                                                                                                                                                                                                                                                                                                                                                                                                                                                                                                                                                                                                                                                                                                              |

|                    |                                                                                                                                                                                                                                                                                                                                                                                                                                                                                                                                                                                                                                                                                                                                                                                                                                                                                                                                                                                                                   |
|--------------------|-------------------------------------------------------------------------------------------------------------------------------------------------------------------------------------------------------------------------------------------------------------------------------------------------------------------------------------------------------------------------------------------------------------------------------------------------------------------------------------------------------------------------------------------------------------------------------------------------------------------------------------------------------------------------------------------------------------------------------------------------------------------------------------------------------------------------------------------------------------------------------------------------------------------------------------------------------------------------------------------------------------------|
| Brunner, 2021 (33) |                                                                                                                                                                                                                                                                                                                                                                                                                                                                                                                                                                                                                                                                                                                                                                                                                                                                                                                                                                                                                   |
| Methods            | <ul style="list-style-type: none"> <li>- Prospective cohort study</li> <li>- Hungary</li> </ul>                                                                                                                                                                                                                                                                                                                                                                                                                                                                                                                                                                                                                                                                                                                                                                                                                                                                                                                   |
| Participants       | <p>52 psoriasis patients undergoing methotrexate therapy</p> <ul style="list-style-type: none"> <li>- Age 54.0±13.4 years</li> <li>- Female 26(50)</li> <li>- BW 91.6 ± 17.7 kg</li> <li>- BMI 31.4 ± 5.1 kg/m<sup>2</sup></li> <li>- Body fat 36.3 ± 8.8 %</li> <li>- Never smoked (n = 17, 32.7%), quit smoking (n = 21, 40.4%), smokes &lt; 5 cigarettes per day (n = 4, 7.7%), smokes 5–10 cigarettes per day (n = 5, 9.6%), smokes 11–20 cigarettes per day (n = 4, 7.7%), smokes &gt; 20 cigarettes per day (n = 1, 1.9%).</li> <li>- MTX duration 4.8 ± 3.0 years</li> <li>- MTX cumulative dose 2.2738 ± 2.2387 g</li> </ul>                                                                                                                                                                                                                                                                                                                                                                              |
| Investigations     | <ul style="list-style-type: none"> <li>- TE</li> </ul>                                                                                                                                                                                                                                                                                                                                                                                                                                                                                                                                                                                                                                                                                                                                                                                                                                                                                                                                                            |
| Outcomes           | <ul style="list-style-type: none"> <li>▪ TE &lt; 8.2 kPa = 72 (82.8)</li> <li>▪ TE &gt; 9.7 kPa = 14 (26.9)</li> <li>▪ No correlation between the patients' liver stiffness values and the cumulative MTX doses. (<math>r^2 = 1.130 \times 10^{-4}</math>, <math>p = 0.803</math>)</li> <li>▪ Patients with higher BMI values, total body fat% and visceral fat scores were significantly more likely to present with higher hepatic stiffness values. BMI was a significant predictor of hepatic fibrosis in both genders. In males, body fat% (<math>R = 0.578</math>, <math>p = 0.002</math>) and, especially, visceral fat scores (<math>R = 0.716</math>, <math>p &lt; 0.001</math>) had statistically significant correlation with stiffness scores, while in females only visceral fat scores were statistically significant predictors of the liver stiffness values (<math>R = 0.452</math>, <math>p = 0.023</math>), and body fat% was not (<math>R = 0.187</math>, <math>p = 0.382</math>).</li> </ul> |
| Comments           |                                                                                                                                                                                                                                                                                                                                                                                                                                                                                                                                                                                                                                                                                                                                                                                                                                                                                                                                                                                                                   |

| Cervoni, 2020 (34) |                                                                                                                                                                                                                                                                                                                                                                                                                                                                                                                                                                                                                                                                                                                                                                      |
|--------------------|----------------------------------------------------------------------------------------------------------------------------------------------------------------------------------------------------------------------------------------------------------------------------------------------------------------------------------------------------------------------------------------------------------------------------------------------------------------------------------------------------------------------------------------------------------------------------------------------------------------------------------------------------------------------------------------------------------------------------------------------------------------------|
| Methods            | <ul style="list-style-type: none"> <li>- Prospective cohort study</li> <li>- France</li> </ul>                                                                                                                                                                                                                                                                                                                                                                                                                                                                                                                                                                                                                                                                       |
| Participants       | <ul style="list-style-type: none"> <li>- 66 psoriasis patients 49 had valid TE results, 63 had Forns index results, 65 had APRI scores, 64 had FPI results, 64 had Hepascore results, 65 had FIB-4 indexes, 64 had NFS scores, 61 had FibroTest results, 64 had Fibrometer NAFLD results)</li> <li>- Age 54±2</li> <li>- Female 39%</li> <li>- MTX treatment 71%</li> <li>- MTX cumulative dose &gt;1500 mg 30%</li> <li>- Alcohol consumption 19±5</li> <li>- Anti-HBc antibodies 7.6%</li> <li>- HCV antibodies 1.5%</li> <li>- ALT &gt;UNL 27%</li> <li>- Weight 78±2</li> <li>- BMI 27.2 ± 0.7</li> <li>- Waist circumference &gt; 35 in (women) &gt;40 in. (men) 50%</li> <li>- Dyslipidemia 39%</li> <li>- Hypertension 70%</li> <li>- Diabetes 23%</li> </ul> |
| Investigations     | <ul style="list-style-type: none"> <li>- TE, FibroTest/FibroSure, Forns index, APRI, FPI, Hepascore, FIB-4, NFS, FibroMeter NAFLD</li> </ul>                                                                                                                                                                                                                                                                                                                                                                                                                                                                                                                                                                                                                         |
| Outcomes           | <ul style="list-style-type: none"> <li>- TE&lt;7.1 kPa = 90.5%</li> <li>- FibroTest&lt;0.49 = 88.6%</li> <li>- Hepascore&lt;0.5 = 92.2%</li> <li>- Forns index&lt;6.9 = 90.5%</li> <li>- FPI&lt;0.8 = 87.5%</li> <li>- FibroMeter&lt;0.49 = 78.1%</li> <li>- FIB-4&gt;3.25 = 4.6%</li> <li>- NFS&gt;0.676 = 6.3%</li> <li>- APRI&gt;1.5 = 3.1%</li> </ul>                                                                                                                                                                                                                                                                                                                                                                                                            |
| Comments           |                                                                                                                                                                                                                                                                                                                                                                                                                                                                                                                                                                                                                                                                                                                                                                      |

|                |                                                                                                                                                                                                                                                                                                                                                                                                                                                                                                                                                                                                                                                                                                                                                                                                                                                            |
|----------------|------------------------------------------------------------------------------------------------------------------------------------------------------------------------------------------------------------------------------------------------------------------------------------------------------------------------------------------------------------------------------------------------------------------------------------------------------------------------------------------------------------------------------------------------------------------------------------------------------------------------------------------------------------------------------------------------------------------------------------------------------------------------------------------------------------------------------------------------------------|
| Yim, 2020 (19) |                                                                                                                                                                                                                                                                                                                                                                                                                                                                                                                                                                                                                                                                                                                                                                                                                                                            |
| Methods        | <ul style="list-style-type: none"> <li>- Retrospective medical record review</li> <li>- Spain</li> </ul>                                                                                                                                                                                                                                                                                                                                                                                                                                                                                                                                                                                                                                                                                                                                                   |
| Participants   | <ul style="list-style-type: none"> <li>- 39 patients with psoriasis with <math>\geq 3</math> months of MTX treatment</li> <li>- Age 49.8</li> <li>- Female 24(61.5)</li> <li>- MTX cumulative dose <math>1.89 \pm 1.5</math> g</li> <li>- MTX duration 238 wk</li> <li>- Diabetes 7(17.9)</li> <li>- Dyslipidemia 12(30.8)</li> <li>- Biologics 26(66.7)</li> <li>- Patients who were lost to follow-up, non-compliant, completed MTX treatment, or had missing laboratory values were excluded</li> </ul>                                                                                                                                                                                                                                                                                                                                                 |
| Investigations | <ul style="list-style-type: none"> <li>- FIB-4</li> </ul>                                                                                                                                                                                                                                                                                                                                                                                                                                                                                                                                                                                                                                                                                                                                                                                                  |
| Outcomes       | <ul style="list-style-type: none"> <li>- FIB-4 &lt; 1.45 = 26(66.7)</li> <li>- FIB-4 &gt; 3.25 = 1(2.6)</li> <li>- No association was found between FIB-4 score and cumulative MTX dose or treatment duration.</li> <li>- However, the change in Fib-4 score over treatment interval was associated with cumulative MTX dose (<math>P = 0.03</math>). Diabetes (<math>P &lt; 0.03</math>), hyperlipidemia (<math>P &lt; 0.05</math>), and statin use (<math>P &lt; 0.02</math>) were found to be associated with higher Fib-4 scores.</li> <li>- 8 patients completed a fibroscan, which demonstrated that a higher Fib-4 score was associated with increased median liver stiffness (<math>P = 0.0002</math>).</li> <li>- 2 patients with no hepatotoxic risk factors and persistently normal LFTs had high-risk Fib-4 scores of 4.39 and 4.6.</li> </ul> |
| Comments       |                                                                                                                                                                                                                                                                                                                                                                                                                                                                                                                                                                                                                                                                                                                                                                                                                                                            |



| Rivera, 2020 (35) |                                                                                                                                                                                                                                                                                                                                                                                                                                                                                                                                                                                                                                                                                                                                                                                                                                                                                                                                                                                                                                                                    |
|-------------------|--------------------------------------------------------------------------------------------------------------------------------------------------------------------------------------------------------------------------------------------------------------------------------------------------------------------------------------------------------------------------------------------------------------------------------------------------------------------------------------------------------------------------------------------------------------------------------------------------------------------------------------------------------------------------------------------------------------------------------------------------------------------------------------------------------------------------------------------------------------------------------------------------------------------------------------------------------------------------------------------------------------------------------------------------------------------|
| Methods           | <ul style="list-style-type: none"> <li>- Retrospective cross-sectional study</li> <li>- Spain</li> </ul>                                                                                                                                                                                                                                                                                                                                                                                                                                                                                                                                                                                                                                                                                                                                                                                                                                                                                                                                                           |
| Participants      | <ul style="list-style-type: none"> <li>- 457 patients (280 with NFS results, and 392 with FIB-4 results) who are treated with MTX</li> <li>- Age <math>53.3 \pm 14.0</math></li> <li>- Female 199 (43.5)</li> <li>- BMI <math>28 \pm 5.1</math></li> <li>- BMI <math>\geq 30 = 134</math> (29.3)</li> <li>- Smoking <math>&gt; 10</math> daily cigarettes consumption = 88 (19.3)</li> <li>- Alcohol <math>&gt; 20</math>, 40g of daily alcohol consumption in female and male = 13 (2.8)</li> <li>- Obesity 203 (44.4)</li> <li>- Dyslipidemia 123 (26.9)</li> <li>- Diabetes 115 (25.2)</li> <li>- Hypertension 116 (25.4)</li> <li>- Patients who had been previously or simultaneously treated with immunomodulatory biologics were excluded from the study, as well as those with severe concomitant diseases that could affect the evaluation of psoriasis impact in HRQoL (e.g., cancer, psychiatric diseases, other skin diseases), those participating in a clinical trial at the time of the study, or who presented other types of psoriasis</li> </ul> |
| Investigations    | <ul style="list-style-type: none"> <li>- FIB-4, NFS</li> </ul>                                                                                                                                                                                                                                                                                                                                                                                                                                                                                                                                                                                                                                                                                                                                                                                                                                                                                                                                                                                                     |
| Outcomes          | <ul style="list-style-type: none"> <li>▪ FIB-4 <math>&lt; 1.3 = 73.8\%</math></li> <li>▪ NFS <math>&lt; -1.455 = 62.8\%</math></li> </ul>                                                                                                                                                                                                                                                                                                                                                                                                                                                                                                                                                                                                                                                                                                                                                                                                                                                                                                                          |
| Comments          |                                                                                                                                                                                                                                                                                                                                                                                                                                                                                                                                                                                                                                                                                                                                                                                                                                                                                                                                                                                                                                                                    |

|                 |                                                                                                                                                                                                                                                                                                                                                                                                                                                                                                                                                                                                                           |
|-----------------|---------------------------------------------------------------------------------------------------------------------------------------------------------------------------------------------------------------------------------------------------------------------------------------------------------------------------------------------------------------------------------------------------------------------------------------------------------------------------------------------------------------------------------------------------------------------------------------------------------------------------|
| Koch, 2020 (36) |                                                                                                                                                                                                                                                                                                                                                                                                                                                                                                                                                                                                                           |
| Methods         | <ul style="list-style-type: none"> <li>- Retrospective</li> <li>- New Zealand</li> </ul>                                                                                                                                                                                                                                                                                                                                                                                                                                                                                                                                  |
| Participants    | <ul style="list-style-type: none"> <li>- 66 psoriasis patients on MTX</li> <li>- Female 34 (51.5)</li> <li>- Age 51.2 (SD 14.0)</li> <li>- MTX cumulative dose 5.7 (SD 7.1) g</li> <li>- MTX cumulative dose &gt; 3.5 g 32 (48.5)</li> <li>- MTX dose/wk 18.1 (SD 5.3) mg</li> <li>- Duration of therapy 72.5 (SD 60.8) months</li> <li>- BMI 32.1 (SD 7.1)</li> <li>- Obesity (BMI&gt;30) 42 (63.6)</li> <li>- Morbid obesity (BMI&gt;35) 20 (30.3)</li> <li>- Diabetes 9 (13.6)</li> <li>- HPT 18 (27.3)</li> <li>- Psoriatic arthritis 7 (10.6)</li> <li>- PIIINP 4.6 (SD 2.0)</li> <li>- PASI 3.9 (SD 4.2)</li> </ul> |
| Investigations  | <ul style="list-style-type: none"> <li>- TE, PIIINP</li> <li>- Liver biopsy performed in 2 patients (3)</li> </ul>                                                                                                                                                                                                                                                                                                                                                                                                                                                                                                        |
| Outcomes        | <ul style="list-style-type: none"> <li>- TE &lt;7.1 kPa = 37(56.1)</li> <li>- TE &gt;9 kPa = 23(34.8)</li> <li>- PIIINP &gt;4.2 µg/L = 29(43.9)</li> </ul>                                                                                                                                                                                                                                                                                                                                                                                                                                                                |
| Comments        |                                                                                                                                                                                                                                                                                                                                                                                                                                                                                                                                                                                                                           |

| Mahajan, 2020 (29) |                                                                                                                                                                                                                                                                                                                                                                                                                                                                                                                                                                                                                                                                                                                                                               |
|--------------------|---------------------------------------------------------------------------------------------------------------------------------------------------------------------------------------------------------------------------------------------------------------------------------------------------------------------------------------------------------------------------------------------------------------------------------------------------------------------------------------------------------------------------------------------------------------------------------------------------------------------------------------------------------------------------------------------------------------------------------------------------------------|
| Methods            | <ul style="list-style-type: none"> <li>▪ Prospective, cross-sectional study</li> <li>▪ India</li> </ul>                                                                                                                                                                                                                                                                                                                                                                                                                                                                                                                                                                                                                                                       |
| Participants       | <ul style="list-style-type: none"> <li>- 134 psoriasis patients</li> <li>- Age 44.13±13.86 years</li> <li>- Age of onset 33.09 ± 14.768 years</li> <li>- Female 40(30.3)</li> <li>- Alcohol intake (any amount) 42(31.3)</li> <li>- Smoking (any number) 32(23.9)</li> <li>- Acitretin 42 patients, cyclosporine 10, hydroxyurea 5</li> <li>- MTX exposure 103(76.9)</li> <li>- MTX cumulative dose 0.89 ± 1.12 g (range 0-5.2 g)</li> <li>- Hypertension 27(20.1)</li> <li>- Diabetes 12(9.8)</li> <li>- Weight 69.06 ± 13.55 kg</li> <li>- Height 164.14 ± 9.23 cm</li> <li>- BMI 25.64 ± 4.34 kg/m<sup>2</sup></li> <li>- WC 95.01 ± 12.25 cm</li> <li>- BSA 17.25 ± 19.9 %</li> <li>- PASI 8.87 ± 6.7 %</li> <li>- Metabolic syndrome 56(41.8)</li> </ul> |
| Investigations     | <ul style="list-style-type: none"> <li>- TE</li> </ul>                                                                                                                                                                                                                                                                                                                                                                                                                                                                                                                                                                                                                                                                                                        |
| Outcomes           | <ul style="list-style-type: none"> <li>▪ TE &lt;7 kPa = 101(75.4)</li> <li>▪ TE ≥9 kPa = 16(6.7)</li> <li>▪ Neither methotrexate exposure nor total cumulative dose of ≥1.5 was associated with significant fibrosis.</li> <li>▪ Female sex (P = 0.024) and the presence of metabolic syndrome (P = 0.034) were the two variables associated with significant liver fibrosis. ORs for the female gender and metabolic syndrome was estimated to be 2.51 (95%CI:1.09–5.81) and 2.33 (95%CI:1.03–5.27), respectively.</li> <li>▪ APRI, NFS and FIB-4 had low sensitivity in comparison to transient elastography.</li> </ul>                                                                                                                                    |
| Comments           |                                                                                                                                                                                                                                                                                                                                                                                                                                                                                                                                                                                                                                                                                                                                                               |

| Magdaleno-Tapia, 2020 (37) |                                                                                                                                                                                                                                                                                                                                                                                                                                                                                                                                                                                                                                                                                                                                         |
|----------------------------|-----------------------------------------------------------------------------------------------------------------------------------------------------------------------------------------------------------------------------------------------------------------------------------------------------------------------------------------------------------------------------------------------------------------------------------------------------------------------------------------------------------------------------------------------------------------------------------------------------------------------------------------------------------------------------------------------------------------------------------------|
| Methods                    | <ul style="list-style-type: none"> <li>- Prospective, cross-sectional study</li> <li>- Spain</li> </ul>                                                                                                                                                                                                                                                                                                                                                                                                                                                                                                                                                                                                                                 |
| Participants               | <ul style="list-style-type: none"> <li>- 71 psoriasis patients</li> <li>- Female 24(33.8)</li> <li>- Age 46.7±14 years</li> <li>- Duration of psoriasis 21±13 years</li> <li>- Maximum historical PASI 14.4±6.5</li> <li>- Maximum historical BSA 24%</li> <li>- Baseline PASI 2±3.3</li> <li>- Psoriatic arthritis 14(20.3)</li> <li>- Treatment at the beginning of the study (n; %); Methotrexate 7(10.1), Ciclosporin 2(2.9), Apremilast 3(4.3), Biological drug 55(71.4)</li> <li>- Comorbidities; smoking 24(36.4), diabetes 14(20.6), hypertension 13(19.1), dyslipidemia 23(33.8), metabolic syndrome 25(36.8)</li> <li>- Weight 84.1±19.8</li> <li>- Height 171±10.1</li> <li>- WC 103.2±17.2</li> <li>- BMI 28.6±6</li> </ul> |
| Investigations             | <ul style="list-style-type: none"> <li>- TE</li> </ul>                                                                                                                                                                                                                                                                                                                                                                                                                                                                                                                                                                                                                                                                                  |
| Outcomes                   | <ul style="list-style-type: none"> <li>- TE &lt; 7.7 kPa = 61(85.9)</li> <li>- TE ≥ 9.5 kPa = 6(8.5)</li> </ul>                                                                                                                                                                                                                                                                                                                                                                                                                                                                                                                                                                                                                         |
| Comments                   |                                                                                                                                                                                                                                                                                                                                                                                                                                                                                                                                                                                                                                                                                                                                         |

|                  |                                                                                                                                                                                                                                                                                                              |
|------------------|--------------------------------------------------------------------------------------------------------------------------------------------------------------------------------------------------------------------------------------------------------------------------------------------------------------|
| Kumar, 2020 (38) |                                                                                                                                                                                                                                                                                                              |
| Methods          | <ul style="list-style-type: none"> <li>- Cross-sectional study</li> <li>- India</li> </ul>                                                                                                                                                                                                                   |
| Participants     | <ul style="list-style-type: none"> <li>- 102 adults with psoriasis who were not treated with methotrexate.</li> <li>- Mean age 42.12</li> <li>- Females 61(59.8)</li> <li>- Exclusion: pregnant women, those with ascites, past liver disease, and patients having active medical device implants</li> </ul> |
| Investigations   | <ul style="list-style-type: none"> <li>- TE</li> </ul>                                                                                                                                                                                                                                                       |
| Outcomes         | <ul style="list-style-type: none"> <li>- TE &lt; 7.5 kPa = 83(81.3)</li> <li>- TE ≥ 10 kPa = 8(7.8)</li> </ul>                                                                                                                                                                                               |
| Comments         |                                                                                                                                                                                                                                                                                                              |

| Neema, 2020 (39) |                                                                                                                                                                                                                                                                                                                                                                                                                                                                                                                                                        |
|------------------|--------------------------------------------------------------------------------------------------------------------------------------------------------------------------------------------------------------------------------------------------------------------------------------------------------------------------------------------------------------------------------------------------------------------------------------------------------------------------------------------------------------------------------------------------------|
| Methods          | <ul style="list-style-type: none"> <li>- Cross-sectional study</li> <li>- India</li> </ul>                                                                                                                                                                                                                                                                                                                                                                                                                                                             |
| Participants     | <p>82 psoriasis patients</p> <ul style="list-style-type: none"> <li>- Age 47.04±12.45</li> <li>- Female 20(24.4)</li> <li>- Psoriasis duration 10.01±8.68</li> <li>- BMI 25.16±3.95</li> <li>- Waist circumference 93.03±9.28</li> <li>- DBP 81.16±7.19</li> <li>- Sugar (F) 94.66±29.56</li> <li>- Sugar (PP) 129.51±47.48</li> <li>- AST 29.93±18.36</li> <li>- PASI 16.26±7.99</li> <li>- PGA 3.76±1.05</li> <li>- MetS 32(39)</li> <li>- MTX cumulative dose &lt;1.5 g = 60 (73.2)</li> <li>- MTX cumulative dose &gt;1.5 g = 22 (26.8)</li> </ul> |
| Investigations   | <ul style="list-style-type: none"> <li>- TE</li> </ul>                                                                                                                                                                                                                                                                                                                                                                                                                                                                                                 |
| Outcomes         | <ul style="list-style-type: none"> <li>- TE &lt; 7 kPa = 59(72.0)</li> <li>- Value of &gt;7 kPa was significantly associated with age, waist circumference, diastolic blood pressure, fasting and post prandial bloodsugar, AST, PASI and presence of metabolic syndrome. Cumulative methotrexate dose was not significantly associated with high TE value. Mean TE value in patients with metabolic syndromewas significantly higher.</li> </ul>                                                                                                      |
| Comments         |                                                                                                                                                                                                                                                                                                                                                                                                                                                                                                                                                        |

|                    |                                                                                                                                                                                                                                                                                                                                                                                                                                                                                                                |                                                                                                                                                                                                                                                                                                                                                                                                                                                                   |
|--------------------|----------------------------------------------------------------------------------------------------------------------------------------------------------------------------------------------------------------------------------------------------------------------------------------------------------------------------------------------------------------------------------------------------------------------------------------------------------------------------------------------------------------|-------------------------------------------------------------------------------------------------------------------------------------------------------------------------------------------------------------------------------------------------------------------------------------------------------------------------------------------------------------------------------------------------------------------------------------------------------------------|
| Ortolan, 2019 (40) |                                                                                                                                                                                                                                                                                                                                                                                                                                                                                                                |                                                                                                                                                                                                                                                                                                                                                                                                                                                                   |
| Methods            | <ul style="list-style-type: none"> <li>- Prospective cohort study</li> <li>- Italy</li> </ul>                                                                                                                                                                                                                                                                                                                                                                                                                  |                                                                                                                                                                                                                                                                                                                                                                                                                                                                   |
| Investigations     | <ul style="list-style-type: none"> <li>- TE</li> </ul>                                                                                                                                                                                                                                                                                                                                                                                                                                                         |                                                                                                                                                                                                                                                                                                                                                                                                                                                                   |
| Participants       | <ul style="list-style-type: none"> <li>- Exclusion criteria: liver diseases (other than NAFLD) potentially causing LF, alcohol consumption <math>\geq 20</math> g/day, daily use of non-steroidal anti-inflammatory drugs for a period <math>\geq 1</math> month in the past year, current use of methotrexate, or use of methotrexate in the previous year and other overlapping rheumatic diseases</li> </ul>                                                                                                |                                                                                                                                                                                                                                                                                                                                                                                                                                                                   |
|                    | <ul style="list-style-type: none"> <li>- Psoriasis arthritis (N=43)</li> <li>- Age <math>60.2 \pm 8.4</math></li> <li>- Female 11(25.6)</li> <li>- PsA duration <math>12.6 \pm 8.5</math></li> <li>- Psoriasis duration <math>20 \pm 12.2</math> years</li> <li>- PASI <math>1.5 \pm 2.5</math></li> <li>- CRP <math>0.5 \pm 0.7</math></li> <li>- BMI <math>25.7 \pm 3.4</math></li> <li>- WC <math>99.7 \pm 12.1</math></li> <li>- DM 16%</li> <li>- HT 46%</li> <li>- MetS 35%</li> <li>- MTX 0%</li> </ul> | <ul style="list-style-type: none"> <li>- Psoriasis without PsA (N=33)</li> <li>- Age <math>54.5 \pm 19.6</math></li> <li>- Female 12 (36.4)</li> <li>- Psoriasis duration <math>18.2 \pm 14.2</math> years</li> <li>- PASI <math>5 \pm 4.6</math></li> <li>- CRP <math>0.7 \pm 0.9</math></li> <li>- BMI <math>29.1 \pm 6.3</math></li> <li>- WC <math>103.1 \pm 13.1</math></li> <li>- DM 21%</li> <li>- HT 33%</li> <li>- MetS 33%</li> <li>- MTX 0%</li> </ul> |
| Outcomes           | <ul style="list-style-type: none"> <li>- TE <math>&lt; 7</math> kPa = 69%</li> </ul>                                                                                                                                                                                                                                                                                                                                                                                                                           | <ul style="list-style-type: none"> <li>- TE <math>&lt; 7</math> kPa = 72%</li> </ul>                                                                                                                                                                                                                                                                                                                                                                              |
|                    | <ul style="list-style-type: none"> <li>- NAFLD was more frequent in PsO (65% vs 35%, <math>p = 0.044</math>).</li> <li>- In multivariable models with NAFLD and LF grading as outcomes, HOMA was independently associated with both (OR 1.34; 95%CI 1.06, 1.69; beta 0.88; 95%CI 0.54, 1.21, respectively).</li> <li>- Female sex was independently associated with LF grading (OR 1.38 ; 95%CI 0.36, 5.29; 0.63 beta 1.81; 95%CI 0.05, 3.57).</li> </ul>                                                      |                                                                                                                                                                                                                                                                                                                                                                                                                                                                   |
| Comments           |                                                                                                                                                                                                                                                                                                                                                                                                                                                                                                                |                                                                                                                                                                                                                                                                                                                                                                                                                                                                   |

| BenLagha, 2019 (41) |                                                                                                                                                                                                                                                                                                                                                                                                                                                                                                                                                                                                                                                                                                                                                                                                                                                                                                                                        |
|---------------------|----------------------------------------------------------------------------------------------------------------------------------------------------------------------------------------------------------------------------------------------------------------------------------------------------------------------------------------------------------------------------------------------------------------------------------------------------------------------------------------------------------------------------------------------------------------------------------------------------------------------------------------------------------------------------------------------------------------------------------------------------------------------------------------------------------------------------------------------------------------------------------------------------------------------------------------|
| Methods             | - Tunisia                                                                                                                                                                                                                                                                                                                                                                                                                                                                                                                                                                                                                                                                                                                                                                                                                                                                                                                              |
| Participants        | <ul style="list-style-type: none"> <li>- 88 patients with psoriasis and valid TE measurements</li> <li>- Female 48(42.9)</li> <li>- Age 45.6±14.3 years</li> <li>- BMI 26.2±41 kg/m<sup>2</sup></li> <li>- Overweight 60.9%, Obese 17%, Central obesity 67%</li> <li>- Diabetes 20.5%</li> <li>- Hypertension 28.4%</li> <li>- Dyslipidemia 26.1%</li> <li>- Metabolic syndrome 40.9%</li> <li>- PASI score 10.4±9.1</li> <li>- Severe psoriasis 65.9%</li> <li>- MTX cumulative dose</li> <li>- Psoriasis duration 12.64±11.52</li> <li>- Exclusion: pregnant women, patients with known liver diseases, heavy alcohol drinkers and regular users of hepatotoxic medications other than methotrexate. Psoriasis was defined as severe in the following conditions: Psoriasis Area and Severity Index (PASI)≥10, or generalized pustular, erythrodermic or arthropathic psoriasis, or requirement of a systemic medication.</li> </ul> |
| Investigations      | - TE                                                                                                                                                                                                                                                                                                                                                                                                                                                                                                                                                                                                                                                                                                                                                                                                                                                                                                                                   |
| Outcomes            | <ul style="list-style-type: none"> <li>- TE &lt;7 kPa = 71(80.7)</li> <li>- TE &gt;9.5 kPa = 5(5.7)</li> </ul>                                                                                                                                                                                                                                                                                                                                                                                                                                                                                                                                                                                                                                                                                                                                                                                                                         |
| Comments            |                                                                                                                                                                                                                                                                                                                                                                                                                                                                                                                                                                                                                                                                                                                                                                                                                                                                                                                                        |



| Maybury, 2019 (42) |                                                                                                                                                                                                                                                                                                                                                                                                                                                                                                                                                                                                                                |
|--------------------|--------------------------------------------------------------------------------------------------------------------------------------------------------------------------------------------------------------------------------------------------------------------------------------------------------------------------------------------------------------------------------------------------------------------------------------------------------------------------------------------------------------------------------------------------------------------------------------------------------------------------------|
| Methods            | <ul style="list-style-type: none"> <li>- Prospective, cross-sectional study</li> <li>- United Kingdom</li> </ul>                                                                                                                                                                                                                                                                                                                                                                                                                                                                                                               |
| Participants       | <ul style="list-style-type: none"> <li>- 400 psoriasis patients (333 had valid TE results)</li> <li>- Severe psoriasis 100%</li> <li>- Age 49.5±13 years</li> <li>- Female 108(27.2)</li> <li>- Weight 88±20 kg</li> <li>- BMI 29.2±7 kg/m<sup>2</sup></li> <li>- WC 102±16 cm</li> <li>- Obesity 135(37.2)</li> <li>- Diabetes 79(22)</li> <li>- HOMA-IR 2.2(IQR 1.3-3.8)</li> <li>- Alcohol 5(IQR 3-6) U/wk</li> <li>- PASI 3.6(IQR 3.10-4.10)</li> <li>- Current MTX use 85(21)</li> <li>- History of MTX use 340(85)</li> <li>- MTX dose 15 (IQR 13.6-15.5) mg/wk</li> <li>- MTX duration 0.6 (IQR 0-2.4) years</li> </ul> |
| Investigations     | <ul style="list-style-type: none"> <li>- TE</li> </ul>                                                                                                                                                                                                                                                                                                                                                                                                                                                                                                                                                                         |
| Outcomes           | <ul style="list-style-type: none"> <li>- TE &lt; 7 kPa = 265(79.6)</li> <li>- TE ≥ 8.7 kPa = 47(14.1)</li> </ul>                                                                                                                                                                                                                                                                                                                                                                                                                                                                                                               |
| Comments           |                                                                                                                                                                                                                                                                                                                                                                                                                                                                                                                                                                                                                                |

| vandenReek, 2017 (55)                           |                                                                                                                                                                                                                                                                                                                                                                                                                                                                                                                                                                                                                                                                                                                                                                                                                                                                                                                                                                                                                                     |                        |                            |                 |                 |                   |                   |               |               |               |               |                 |                 |              |                   |                         |                         |                     |                     |                     |                     |                                            |                                            |                                                 |                                                  |
|-------------------------------------------------|-------------------------------------------------------------------------------------------------------------------------------------------------------------------------------------------------------------------------------------------------------------------------------------------------------------------------------------------------------------------------------------------------------------------------------------------------------------------------------------------------------------------------------------------------------------------------------------------------------------------------------------------------------------------------------------------------------------------------------------------------------------------------------------------------------------------------------------------------------------------------------------------------------------------------------------------------------------------------------------------------------------------------------------|------------------------|----------------------------|-----------------|-----------------|-------------------|-------------------|---------------|---------------|---------------|---------------|-----------------|-----------------|--------------|-------------------|-------------------------|-------------------------|---------------------|---------------------|---------------------|---------------------|--------------------------------------------|--------------------------------------------|-------------------------------------------------|--------------------------------------------------|
| Methods                                         | - Netherlands                                                                                                                                                                                                                                                                                                                                                                                                                                                                                                                                                                                                                                                                                                                                                                                                                                                                                                                                                                                                                       |                        |                            |                 |                 |                   |                   |               |               |               |               |                 |                 |              |                   |                         |                         |                     |                     |                     |                     |                                            |                                            |                                                 |                                                  |
| Participants                                    | <table border="1"> <thead> <tr> <th>Elevated PIIINP (N=41)</th> <th>No elevated PIIINP (N=142)</th> </tr> </thead> <tbody> <tr> <td>- Age 55.9±16.5</td> <td>- Age 48.3±15.8</td> </tr> <tr> <td>- Female 20(48.8)</td> <td>- Female 61(43.0)</td> </tr> <tr> <td>- Alcohol use</td> <td>- Alcohol use</td> </tr> <tr> <td>    o No 19(46.3)</td> <td>    o No 42(29.6)</td> </tr> <tr> <td>    o 0-20 13(31.7)</td> <td>    o 0-20 53(37.3)</td> </tr> <tr> <td>    o &gt;21 unit -</td> <td>    o &gt;21 unit 3(2.1)</td> </tr> <tr> <td>    o Amount unknown 4(9.8)</td> <td>    o Amount unknown 5(3.5)</td> </tr> <tr> <td>- Malignancy 4(9.8)</td> <td>- Malignancy 7(4.9)</td> </tr> <tr> <td>- Diabetics 5(12.2)</td> <td>- Diabetics 11(7.7)</td> </tr> <tr> <td>- Duration of MTX use 3.7 (0.7-33.2) years</td> <td>- Duration of MTX use 3.3 (0.5-36.7) years</td> </tr> <tr> <td>- Cumulative dose of MTX 2.747 (0.33-24.253) mg</td> <td>- Cumulative dose of MTX 2.270 (0.280-20.180) mg</td> </tr> </tbody> </table> | Elevated PIIINP (N=41) | No elevated PIIINP (N=142) | - Age 55.9±16.5 | - Age 48.3±15.8 | - Female 20(48.8) | - Female 61(43.0) | - Alcohol use | - Alcohol use | o No 19(46.3) | o No 42(29.6) | o 0-20 13(31.7) | o 0-20 53(37.3) | o >21 unit - | o >21 unit 3(2.1) | o Amount unknown 4(9.8) | o Amount unknown 5(3.5) | - Malignancy 4(9.8) | - Malignancy 7(4.9) | - Diabetics 5(12.2) | - Diabetics 11(7.7) | - Duration of MTX use 3.7 (0.7-33.2) years | - Duration of MTX use 3.3 (0.5-36.7) years | - Cumulative dose of MTX 2.747 (0.33-24.253) mg | - Cumulative dose of MTX 2.270 (0.280-20.180) mg |
| Elevated PIIINP (N=41)                          | No elevated PIIINP (N=142)                                                                                                                                                                                                                                                                                                                                                                                                                                                                                                                                                                                                                                                                                                                                                                                                                                                                                                                                                                                                          |                        |                            |                 |                 |                   |                   |               |               |               |               |                 |                 |              |                   |                         |                         |                     |                     |                     |                     |                                            |                                            |                                                 |                                                  |
| - Age 55.9±16.5                                 | - Age 48.3±15.8                                                                                                                                                                                                                                                                                                                                                                                                                                                                                                                                                                                                                                                                                                                                                                                                                                                                                                                                                                                                                     |                        |                            |                 |                 |                   |                   |               |               |               |               |                 |                 |              |                   |                         |                         |                     |                     |                     |                     |                                            |                                            |                                                 |                                                  |
| - Female 20(48.8)                               | - Female 61(43.0)                                                                                                                                                                                                                                                                                                                                                                                                                                                                                                                                                                                                                                                                                                                                                                                                                                                                                                                                                                                                                   |                        |                            |                 |                 |                   |                   |               |               |               |               |                 |                 |              |                   |                         |                         |                     |                     |                     |                     |                                            |                                            |                                                 |                                                  |
| - Alcohol use                                   | - Alcohol use                                                                                                                                                                                                                                                                                                                                                                                                                                                                                                                                                                                                                                                                                                                                                                                                                                                                                                                                                                                                                       |                        |                            |                 |                 |                   |                   |               |               |               |               |                 |                 |              |                   |                         |                         |                     |                     |                     |                     |                                            |                                            |                                                 |                                                  |
| o No 19(46.3)                                   | o No 42(29.6)                                                                                                                                                                                                                                                                                                                                                                                                                                                                                                                                                                                                                                                                                                                                                                                                                                                                                                                                                                                                                       |                        |                            |                 |                 |                   |                   |               |               |               |               |                 |                 |              |                   |                         |                         |                     |                     |                     |                     |                                            |                                            |                                                 |                                                  |
| o 0-20 13(31.7)                                 | o 0-20 53(37.3)                                                                                                                                                                                                                                                                                                                                                                                                                                                                                                                                                                                                                                                                                                                                                                                                                                                                                                                                                                                                                     |                        |                            |                 |                 |                   |                   |               |               |               |               |                 |                 |              |                   |                         |                         |                     |                     |                     |                     |                                            |                                            |                                                 |                                                  |
| o >21 unit -                                    | o >21 unit 3(2.1)                                                                                                                                                                                                                                                                                                                                                                                                                                                                                                                                                                                                                                                                                                                                                                                                                                                                                                                                                                                                                   |                        |                            |                 |                 |                   |                   |               |               |               |               |                 |                 |              |                   |                         |                         |                     |                     |                     |                     |                                            |                                            |                                                 |                                                  |
| o Amount unknown 4(9.8)                         | o Amount unknown 5(3.5)                                                                                                                                                                                                                                                                                                                                                                                                                                                                                                                                                                                                                                                                                                                                                                                                                                                                                                                                                                                                             |                        |                            |                 |                 |                   |                   |               |               |               |               |                 |                 |              |                   |                         |                         |                     |                     |                     |                     |                                            |                                            |                                                 |                                                  |
| - Malignancy 4(9.8)                             | - Malignancy 7(4.9)                                                                                                                                                                                                                                                                                                                                                                                                                                                                                                                                                                                                                                                                                                                                                                                                                                                                                                                                                                                                                 |                        |                            |                 |                 |                   |                   |               |               |               |               |                 |                 |              |                   |                         |                         |                     |                     |                     |                     |                                            |                                            |                                                 |                                                  |
| - Diabetics 5(12.2)                             | - Diabetics 11(7.7)                                                                                                                                                                                                                                                                                                                                                                                                                                                                                                                                                                                                                                                                                                                                                                                                                                                                                                                                                                                                                 |                        |                            |                 |                 |                   |                   |               |               |               |               |                 |                 |              |                   |                         |                         |                     |                     |                     |                     |                                            |                                            |                                                 |                                                  |
| - Duration of MTX use 3.7 (0.7-33.2) years      | - Duration of MTX use 3.3 (0.5-36.7) years                                                                                                                                                                                                                                                                                                                                                                                                                                                                                                                                                                                                                                                                                                                                                                                                                                                                                                                                                                                          |                        |                            |                 |                 |                   |                   |               |               |               |               |                 |                 |              |                   |                         |                         |                     |                     |                     |                     |                                            |                                            |                                                 |                                                  |
| - Cumulative dose of MTX 2.747 (0.33-24.253) mg | - Cumulative dose of MTX 2.270 (0.280-20.180) mg                                                                                                                                                                                                                                                                                                                                                                                                                                                                                                                                                                                                                                                                                                                                                                                                                                                                                                                                                                                    |                        |                            |                 |                 |                   |                   |               |               |               |               |                 |                 |              |                   |                         |                         |                     |                     |                     |                     |                                            |                                            |                                                 |                                                  |
| Investigations                                  | - PIIINP<br>- Liver biopsy                                                                                                                                                                                                                                                                                                                                                                                                                                                                                                                                                                                                                                                                                                                                                                                                                                                                                                                                                                                                          |                        |                            |                 |                 |                   |                   |               |               |               |               |                 |                 |              |                   |                         |                         |                     |                     |                     |                     |                                            |                                            |                                                 |                                                  |
| Outcomes                                        | <ul style="list-style-type: none"> <li>- elevated PIIINP = 41 (22.4)</li> <li>- 20 (49%) were referred to a hepatologist and/or underwent further diagnostics, and 6 of the 20 referred patients showed no liver abnormalities on biopsy, ultrasound or Fibroscan. Relevant liver problems consisted of Roenigk 3b (n = 1) and Roenigk 3a (n = 1) detected by liver biopsy, and high liver stiffness detected with Fibroscan (n = 2).</li> <li>- 21 of 142 with normal PIIINP underwent further investigations; highest fibrosis score found was Roenigk 2–3a in 1 of 18 patients. Of note, 1 patient in this group had a Fibroscan stage F2, but liver biopsy showed Roenigk 1.</li> </ul>                                                                                                                                                                                                                                                                                                                                         |                        |                            |                 |                 |                   |                   |               |               |               |               |                 |                 |              |                   |                         |                         |                     |                     |                     |                     |                                            |                                            |                                                 |                                                  |
| Comments                                        |                                                                                                                                                                                                                                                                                                                                                                                                                                                                                                                                                                                                                                                                                                                                                                                                                                                                                                                                                                                                                                     |                        |                            |                 |                 |                   |                   |               |               |               |               |                 |                 |              |                   |                         |                         |                     |                     |                     |                     |                                            |                                            |                                                 |                                                  |

| vanderVoort, 2017 (54) |                                                                                                                                                                                                                                                                                                                                                                                                                                                                                                                                                                                                                        |                                                                                                                                                                                                                                                                                                                                                                                                                                                                                                                                                                                                                     |
|------------------------|------------------------------------------------------------------------------------------------------------------------------------------------------------------------------------------------------------------------------------------------------------------------------------------------------------------------------------------------------------------------------------------------------------------------------------------------------------------------------------------------------------------------------------------------------------------------------------------------------------------------|---------------------------------------------------------------------------------------------------------------------------------------------------------------------------------------------------------------------------------------------------------------------------------------------------------------------------------------------------------------------------------------------------------------------------------------------------------------------------------------------------------------------------------------------------------------------------------------------------------------------|
| Methods                | - Cross-sectional                                                                                                                                                                                                                                                                                                                                                                                                                                                                                                                                                                                                      |                                                                                                                                                                                                                                                                                                                                                                                                                                                                                                                                                                                                                     |
| Investigations         | - ELF, PIIINP                                                                                                                                                                                                                                                                                                                                                                                                                                                                                                                                                                                                          |                                                                                                                                                                                                                                                                                                                                                                                                                                                                                                                                                                                                                     |
| Participants           | <ul style="list-style-type: none"> <li>- 119 PSO</li> <li>- Age 49.8±14.3 years</li> <li>- Female 45(37.8)</li> <li>- BMI 27.2±5.8</li> <li>- Disease duration; 20.1±14.5 years</li> <li>- Severe psoriasis 15(12.5)</li> <li>- PASI; 5.9±5.8</li> <li>- MTX 18 (15.1)</li> <li>- Diabetes 16 (12.1)</li> <li>- Hypertension 40 (22.2)</li> <li>- Dyslipidemia 80 (44.7)</li> <li>- Alcohol intake (drinks/day) none/≤3/&gt;3 = 43.2/47.7/9</li> <li>- Smoking never/former/current = 27.7/29.4/42.9</li> <li>- Median values (IQR) of ELF 8.96 (1.20)</li> <li>- Median values (IQR) of PIIINP 7.56 (2.92)</li> </ul> | <ul style="list-style-type: none"> <li>- 151 PsA</li> <li>- Age 52.8±11.7 years</li> <li>- Female 70(46.3)</li> <li>- BMI 26.5±4.2</li> <li>- Disease duration; 9.9±9.3 years</li> <li>- Severe psoriasis 2(1.3)</li> <li>- PASI; 1.5±2.4</li> <li>- MTX 69 (45.7)</li> <li>- Diabetes 8 (7.3)</li> <li>- Hypertension 38 (24.7)</li> <li>- Dyslipidemia 38 (24.7)</li> <li>- Alcohol intake (drinks/day) none/≤3/&gt;3 = 30.9/66.2/2.9</li> <li>- Smoking never/former/current = 40.5/42.5/17</li> <li>- Median values (IQR) of ELF = 8.93 (0.98)</li> <li>- Median values (IQR) of PIIINP = 7.23 (2.8)</li> </ul> |
| Outcomes               | <ul style="list-style-type: none"> <li>- ELF &gt; 9.8 = 25(21)</li> <li>- PIIINP &gt; 12.2 = 7(6)</li> <li>- PIIINP &gt; 15.3 = 6(5.2)</li> </ul>                                                                                                                                                                                                                                                                                                                                                                                                                                                                      | <ul style="list-style-type: none"> <li>- ELF &gt; 9.8 = 20(13.2)</li> <li>- PIIINP &gt; 12.2 = 9(6)</li> <li>- PIIINP &gt; 15.3 = 2(1.3)</li> </ul>                                                                                                                                                                                                                                                                                                                                                                                                                                                                 |
| Comments               |                                                                                                                                                                                                                                                                                                                                                                                                                                                                                                                                                                                                                        |                                                                                                                                                                                                                                                                                                                                                                                                                                                                                                                                                                                                                     |

|                  |                                                                                                                                                                                                                                                                                                                                                                                                                                                                                                                                                                                                                                   |
|------------------|-----------------------------------------------------------------------------------------------------------------------------------------------------------------------------------------------------------------------------------------------------------------------------------------------------------------------------------------------------------------------------------------------------------------------------------------------------------------------------------------------------------------------------------------------------------------------------------------------------------------------------------|
| Bauer, 2017 (43) |                                                                                                                                                                                                                                                                                                                                                                                                                                                                                                                                                                                                                                   |
| Methods          | <ul style="list-style-type: none"> <li>- A retrospective descriptive analysis</li> <li>- United States</li> </ul>                                                                                                                                                                                                                                                                                                                                                                                                                                                                                                                 |
| Participants     | <ul style="list-style-type: none"> <li>- 107 psoriasis patients undergoing treatment with MTX (69 had NASH FibroSure testing prior to starting MTX)</li> <li>- Age 83.3±13.5 years</li> <li>- Female 57(53.2)</li> <li>- Non-hispanic white 107(100)</li> <li>- BMI &lt;28/28-30/&gt;30 = 3(2.8), 17(15.9). 87(81.3)</li> <li>- Diabetes 17(15.9)</li> <li>- CKD stage III 4(3.7)</li> <li>- Patients were excluded if they were younger than 18 years of age, had received MTX therapy for another indication, had received less than a 500-mg cumulative dose of MTX, or had been taking MTX for fewer than 90 days.</li> </ul> |
| Investigations   | <ul style="list-style-type: none"> <li>- FibroSure (FibroTest)</li> </ul>                                                                                                                                                                                                                                                                                                                                                                                                                                                                                                                                                         |
| Outcomes         | <ul style="list-style-type: none"> <li>- FibroSure not elevated = 50(71.5)</li> <li>- 54 (78.3%) had elevated steatosis scores.</li> <li>- Among the 107 patients who underwent NASH FibroSure testing during MTX therapy, the cumulative MTX dose corresponded to a statistically significant association of a higher NASH FibroSure hepatic fibrosis score in women (Spearman <math>\rho = 0.21</math>; <math>P = .02</math>) but not in men (Spearman <math>\rho = 0.17</math>; <math>P = .11</math>).</li> <li>- All patients in the cohort except 1 were managed without a liver biopsy.</li> </ul>                          |
| Comments         |                                                                                                                                                                                                                                                                                                                                                                                                                                                                                                                                                                                                                                   |

|                  |                                                                                                                                                                                                                                                                                                                                                                                                                                      |                                                                                                                                                                                                                                                                                                                                                 |                                                                                                                                                                                                                                                                                                              |
|------------------|--------------------------------------------------------------------------------------------------------------------------------------------------------------------------------------------------------------------------------------------------------------------------------------------------------------------------------------------------------------------------------------------------------------------------------------|-------------------------------------------------------------------------------------------------------------------------------------------------------------------------------------------------------------------------------------------------------------------------------------------------------------------------------------------------|--------------------------------------------------------------------------------------------------------------------------------------------------------------------------------------------------------------------------------------------------------------------------------------------------------------|
| Talme, 2017 (44) |                                                                                                                                                                                                                                                                                                                                                                                                                                      |                                                                                                                                                                                                                                                                                                                                                 |                                                                                                                                                                                                                                                                                                              |
| Methods          | <ul style="list-style-type: none"> <li>- Prospective, cohort study</li> <li>- Sweden</li> </ul>                                                                                                                                                                                                                                                                                                                                      |                                                                                                                                                                                                                                                                                                                                                 |                                                                                                                                                                                                                                                                                                              |
| Investigations   | <ul style="list-style-type: none"> <li>- TE</li> </ul>                                                                                                                                                                                                                                                                                                                                                                               |                                                                                                                                                                                                                                                                                                                                                 |                                                                                                                                                                                                                                                                                                              |
| Participants     | <ul style="list-style-type: none"> <li>- 201 psoriasis patients divided into 3 groups:</li> </ul>                                                                                                                                                                                                                                                                                                                                    |                                                                                                                                                                                                                                                                                                                                                 |                                                                                                                                                                                                                                                                                                              |
|                  | <p>Biologics (N=32)</p> <ul style="list-style-type: none"> <li>- Female 6(18.8)</li> <li>- Age 48(18-76)</li> <li>- Duration of psoriasis 20(21-38)</li> <li>- BMI 27(21-38)</li> <li>- BMI&gt;25 25(75)</li> <li>- BMI &gt;30 13(41)</li> <li>- DM 7(21.8)</li> </ul>                                                                                                                                                               | <p>MTX &gt; 24 months (N=122)</p> <ul style="list-style-type: none"> <li>- Female 52(41.9)</li> <li>- Age 60(22-82)</li> <li>- Duration of psoriasis 27(5-66)</li> <li>- BMI 28(19-42)</li> <li>- BMI&gt;25 82(68)</li> <li>- BMI&gt;30 37(31)</li> <li>- BMI&gt;40 1(0.8)</li> <li>- DM 20(16.1)</li> <li>- MTX duration 60(25-432)</li> </ul> | <p>MTX ≤ 24 months (N=47)</p> <ul style="list-style-type: none"> <li>- Female 17(34.7)</li> <li>- Age 50(20-76)</li> <li>- Duration of psoriasis 24(4-53)</li> <li>- BMI 27(20-40)</li> <li>- BMI&gt;25 31(69)</li> <li>- BMI&gt;30 15(33)</li> <li>- DM 5(10.2)</li> <li>- MTX duration 16(1-24)</li> </ul> |
| Outcomes         | <ul style="list-style-type: none"> <li>- TE &lt;6.5 kPa = 20(62.5)</li> <li>- TE &gt;11.5 kPa = 1(3.1)</li> </ul>                                                                                                                                                                                                                                                                                                                    | <ul style="list-style-type: none"> <li>- TE &lt;6.5 kPa = 76(62.3)</li> <li>- TE &gt;11.5 kPa = 11(9)</li> </ul>                                                                                                                                                                                                                                | <ul style="list-style-type: none"> <li>- TE &lt;6.5 kPa = 32(68.1)</li> <li>- TE &gt;11.5 kPa = 3(6.4)</li> </ul>                                                                                                                                                                                            |
|                  | <ul style="list-style-type: none"> <li>- BMI &gt;30 and diabetes were the strongest predictors for liver fibrosis</li> <li>- BMI &gt;30 associated with TE &gt;6.5 kPa and &gt;11.5 kPa with ORs of 5.53 (95CI: 2.94–10.68) and 11.42 (95CI: 4.00–41.24), respectively.</li> <li>- Diabetes associated with TE &gt;6.5 kPa and &gt;11.5 kPa with ORs of 3.37 (95CI: 1.52–7.77) and 4.42 (95CI: 1.59–11.76), respectively,</li> </ul> |                                                                                                                                                                                                                                                                                                                                                 |                                                                                                                                                                                                                                                                                                              |
| Comments         |                                                                                                                                                                                                                                                                                                                                                                                                                                      |                                                                                                                                                                                                                                                                                                                                                 |                                                                                                                                                                                                                                                                                                              |

| Rongngern, 2017 (45) |                                                                                                                                                                                                                                                                                                                                                                                                                                                                                                                    |
|----------------------|--------------------------------------------------------------------------------------------------------------------------------------------------------------------------------------------------------------------------------------------------------------------------------------------------------------------------------------------------------------------------------------------------------------------------------------------------------------------------------------------------------------------|
| Methods              | <ul style="list-style-type: none"> <li>- Retrospective study</li> <li>- Thailand</li> </ul>                                                                                                                                                                                                                                                                                                                                                                                                                        |
| Participants         | <ul style="list-style-type: none"> <li>- 41 psoriasis patients who had received methotrexate</li> <li>- Female 17(41.5)</li> <li>- Age 51.2±11.6 years</li> <li>- Psoriasis duration 12.7±5.9 years</li> <li>- MetS 43.9%</li> <li>- DLP 42.5%</li> <li>- HT 39.3%</li> <li>- DM 11(26.8)</li> <li>- BMI 24.9±4.6 kg/m<sup>2</sup></li> <li>- MTX cumulative dose 1.65 (range 0.8-8)</li> <li>- MTX duration 6.4±3.2 years</li> <li>- 2 (4.9%) occasionally drank alcohol during methotrexate treatment</li> </ul> |
| Investigations       | <ul style="list-style-type: none"> <li>- TE</li> <li>- Liver biopsy</li> </ul>                                                                                                                                                                                                                                                                                                                                                                                                                                     |
| Outcomes             | <ul style="list-style-type: none"> <li>- TE &lt; 7.1 kPa = 31(75.6)</li> <li>- TE ≥ 10 kPa = 3(7.3)</li> <li>- TE ≥ 7.1 kPa; [Roenigk≥3a] sensitivity 50%, specificity 83.9%, PPV 50%, NPV 83.9%, accuracy 75.6%; [Metavir≥F2] sensitivity 50%, specificity 76.9%, PPV 10%, NPV 96.8%, accuracy 75.6%</li> <li>- Ten of 41 patients developed methotrexate-induced liver injury (Roenigk grade≥3a) and two of them had significant liver fibrosis (Metavir fibrosis stage ≥2).</li> </ul>                          |
| Comments             |                                                                                                                                                                                                                                                                                                                                                                                                                                                                                                                    |

| Pongpit, 2016 (46) |                                                                                                                                                                                                                                                                                                                                                                                                                                                                                                                                                                                    |
|--------------------|------------------------------------------------------------------------------------------------------------------------------------------------------------------------------------------------------------------------------------------------------------------------------------------------------------------------------------------------------------------------------------------------------------------------------------------------------------------------------------------------------------------------------------------------------------------------------------|
| Methods            | <ul style="list-style-type: none"> <li>- Prospective, cross-sectional study</li> <li>- Thailand</li> </ul>                                                                                                                                                                                                                                                                                                                                                                                                                                                                         |
| Participants       | <ul style="list-style-type: none"> <li>- 165 patients with psoriasis</li> <li>- Age 49.2±14</li> <li>- Female 90(54.5)</li> <li>- BMI 24.8±4.7 kg/m<sup>2</sup></li> <li>- Overweight 32.1%</li> <li>- Obesity 20(12)</li> <li>- WC 87.0±12.3 cm</li> <li>- DLP 88(53.3)</li> <li>- HT 55(33.3)</li> <li>- DM 31(18.8)</li> <li>- MetS 83(50.3)</li> <li>- Duration of disease (years)†16.5±12.1</li> <li>- PASI 3.0±2.7</li> <li>- PASI &gt;10 = 6(3.2)</li> <li>- MTX cumulative dose; 0gm 57(34.5), 0-1.5gm 69(41.8), &gt;1.5gm 39(23.5)</li> <li>- TE 5.3 ± 2.9 kPa</li> </ul> |
| Investigations     | <ul style="list-style-type: none"> <li>- TE</li> </ul>                                                                                                                                                                                                                                                                                                                                                                                                                                                                                                                             |
| Outcomes           | <ul style="list-style-type: none"> <li>- TE &lt;7 kPa = 147(89.1)</li> <li>- TE &gt; 9.5 kPa = 11(6.7)</li> <li>- Two patients with LSM of 8.9 and 11 kPa underwent liver biopsy. The pathological reports revealed that Metavir fibrotic staging of F2 and F3 without hepatitis was confirmed.</li> <li>- Waist circumference (OR: 1.24; 95% CI: 1.11–1.38; <i>P</i> = 0.0002), diabetes (OR: 12.70; 95% CI: 1.84–87.70; <i>P</i> = 0.010), and AST (OR: 1.08; 95% CI: 1.02–1.16; <i>P</i> = 0.017) were associated with high LSM.</li> </ul>                                     |
| Comments           |                                                                                                                                                                                                                                                                                                                                                                                                                                                                                                                                                                                    |

| Gisoni, 2016 (47) |                                                                                                                                                                                                                                                                                                                                                                                                                                                                                                                                                                                                                                                                                                                                                                                                                                                                                                                                                                                                                                                                                                                                 |
|-------------------|---------------------------------------------------------------------------------------------------------------------------------------------------------------------------------------------------------------------------------------------------------------------------------------------------------------------------------------------------------------------------------------------------------------------------------------------------------------------------------------------------------------------------------------------------------------------------------------------------------------------------------------------------------------------------------------------------------------------------------------------------------------------------------------------------------------------------------------------------------------------------------------------------------------------------------------------------------------------------------------------------------------------------------------------------------------------------------------------------------------------------------|
| Methods           | <ul style="list-style-type: none"> <li>- Cross-sectional study</li> <li>- Italy</li> </ul>                                                                                                                                                                                                                                                                                                                                                                                                                                                                                                                                                                                                                                                                                                                                                                                                                                                                                                                                                                                                                                      |
| Participants      | <ul style="list-style-type: none"> <li>- 124 patients with chronic plaque psoriasis (55 with NFS results)</li> <li>- Female 55 (44)</li> <li>- Age 55±12 years</li> <li>- Disease duration 21±13 (1–63) years</li> <li>- Age of onset 34±15 (1–73) years</li> <li>- Hypertension 41 (33%)</li> <li>- Diabetes 23 (18%)</li> <li>- PASI 13±10 (1–58)</li> <li>- BMI 27.2±5</li> <li>- Psoriatic arthritis 37 (29.8%)</li> <li>- Dyslipidemia 13 (11%)</li> <li>- AST 29±22</li> <li>- ALT 35±34</li> <li>- PLT 237±60</li> <li>- Albumin 42±4</li> <li>- NFS -1.57±1.4</li> <li>- Liver steatosis 73 (59%)</li> <li>- NAFLD 55 (44%)</li> <li>- Alcohol; abstainers/ 1-2 drinks per day/ &gt; 3 drinks per day = 33 (38%)/ 42 (48%)/ 12 (14%)</li> <li>- Exclusion: Patients who had any clinical evidence of malignancy, cirrhosis or other secondary causes of chronic liver disease (i.e., autoimmune hepatitis, regular use of potentially hepatotoxic medications such as methotrexate, isoniazid, alpha-methyl dopa, amiodarone or chemotherapies and a history of excessive alcohol consumption) were excluded</li> </ul> |
| Investigations    | <ul style="list-style-type: none"> <li>- NFS</li> </ul>                                                                                                                                                                                                                                                                                                                                                                                                                                                                                                                                                                                                                                                                                                                                                                                                                                                                                                                                                                                                                                                                         |
| Outcomes          | <ul style="list-style-type: none"> <li>- NFS &lt; -1.455 = 30 (54.5)</li> <li>- NFS &gt; 0.676 = 4 (7.3)</li> <li>- Psoriasis resulted in a significant predictor of advanced liver fibrosis independently of age, sex, BMI, hypertension and diabetes in the multivariate analysis</li> </ul>                                                                                                                                                                                                                                                                                                                                                                                                                                                                                                                                                                                                                                                                                                                                                                                                                                  |
| Comments          |                                                                                                                                                                                                                                                                                                                                                                                                                                                                                                                                                                                                                                                                                                                                                                                                                                                                                                                                                                                                                                                                                                                                 |



| vanderVoort, 2016 (53) |                                                                                                                                                                                                                                                                                                                                                                                                                                                                                                                                                                                                                                                                                                                                                                                                       |
|------------------------|-------------------------------------------------------------------------------------------------------------------------------------------------------------------------------------------------------------------------------------------------------------------------------------------------------------------------------------------------------------------------------------------------------------------------------------------------------------------------------------------------------------------------------------------------------------------------------------------------------------------------------------------------------------------------------------------------------------------------------------------------------------------------------------------------------|
| Methods                | <ul style="list-style-type: none"> <li>- Prospective, case-control study</li> <li>- Netherlands</li> </ul>                                                                                                                                                                                                                                                                                                                                                                                                                                                                                                                                                                                                                                                                                            |
| Participants           | <ul style="list-style-type: none"> <li>- 74 psoriasis patients with reliable TE scan</li> <li>- Age 71.2±6.5 years</li> <li>- Female 44.6%</li> <li>- BMI 26.6 (24.1-28.5) kg/m<sup>2</sup></li> <li>- Alcohol intake 7.5(IQR 0.9-7.5) U/wk</li> <li>- Viral hepatitis 1.4%</li> <li>- Hepatotoxic medication 2.7%</li> <li>- Smoking never/former/current = 27.4/60.3/12.3</li> <li>- MetS 52.1%</li> <li>- FBS&gt;100 or on DM medication 41.4%</li> <li>- Waist circumference &gt;88cm(female) &gt;102cm(male) 45.8%</li> <li>- TG &gt;150 or on DLP medication 41.1%</li> <li>- HDL &lt; 40mg/dl(female) &lt; 50 mg/dl(male) or on DLP medication 37.5%</li> <li>- BP≥130/85 or on HT medication 88.1%</li> <li>- Psoriasis duration 11.2 (IQR 15.8) years</li> <li>- PASI 2 (IQR 3.2)</li> </ul> |
| Investigations         | <ul style="list-style-type: none"> <li>- TE</li> </ul>                                                                                                                                                                                                                                                                                                                                                                                                                                                                                                                                                                                                                                                                                                                                                |
| Outcomes               | <ul style="list-style-type: none"> <li>- TE &gt; 9.5 kPa = 6(8.1)</li> </ul>                                                                                                                                                                                                                                                                                                                                                                                                                                                                                                                                                                                                                                                                                                                          |
| Comments               |                                                                                                                                                                                                                                                                                                                                                                                                                                                                                                                                                                                                                                                                                                                                                                                                       |

|                           |                                                                                                                                                                                                                                                                                                                                                                                                                                                                                                                                                                                                                                           |
|---------------------------|-------------------------------------------------------------------------------------------------------------------------------------------------------------------------------------------------------------------------------------------------------------------------------------------------------------------------------------------------------------------------------------------------------------------------------------------------------------------------------------------------------------------------------------------------------------------------------------------------------------------------------------------|
| Martyn-Simmons, 2014 (65) |                                                                                                                                                                                                                                                                                                                                                                                                                                                                                                                                                                                                                                           |
| Methods                   | <ul style="list-style-type: none"> <li>- Retrospective cohort study</li> <li>- United Kingdom</li> </ul>                                                                                                                                                                                                                                                                                                                                                                                                                                                                                                                                  |
| Participants              | <ul style="list-style-type: none"> <li>- 27 chronic plaque psoriasis patients</li> <li>- Age <math>56 \pm 2.7</math> (26-77)</li> <li>- Female 9 (33%)</li> <li>- Comorbidities; diabetes 7 (26%), hypercholesterolemia 7 (26%), ischemic heart disease 5 (19%)</li> <li>- Current smoker 7(26%), ex-smoker 5(19%), non-smoker 10(37%)</li> <li>- Alcohol intake &gt; 20 units/week 2 (8%)</li> <li>- Mean weight 91 kg (range 49-130, SEM 4.3)</li> <li>- Mean weekly dose of MTX 14.44 mg (range 5-30, SEM 1.17)</li> <li>- Mean cumulative dose of MTX 7.53 g (range 0.87-22.36, SEM 1.30)</li> </ul>                                  |
| Investigations            | <ul style="list-style-type: none"> <li>- PIIINP &gt; 4.2 <math>\mu\text{g/L}</math></li> <li>- ELF</li> <li>- Liver biopsy</li> </ul>                                                                                                                                                                                                                                                                                                                                                                                                                                                                                                     |
| Outcomes                  | <ul style="list-style-type: none"> <li>- AUROCs for mild fibrosis of serial and serial ELF were 0.589 (95CI: 0.379–0.800) and 0.643 (95CI: 0.391–0.895), respectively.</li> <li>- AUROCs for at least moderate fibrosis of serial and serial ELF were 0.576 (95CI: 0.237–0.916) and 0.674 (95CI: 0.421–0.927), respectively.</li> <li>- AUROCs for mild fibrosis of single PIIINP and single ELF were 0.582 (95CI: 0.363–0.801) and 0.693 (95% CI 0.482–0.904), respectively.</li> <li>- AUROCs for at least moderate fibrosis of single PIIINP and single ELF were 0.667 (95% CI 0.363– 0.971) and 0.806 (95% CI 0.564–1.000)</li> </ul> |
| Comments                  |                                                                                                                                                                                                                                                                                                                                                                                                                                                                                                                                                                                                                                           |

| Lynch, 2014 (48) |                                                                                                                                                                                                                                                                                                                                                                                                                                                                                                                                                                                                                                                                                                                                                                                                                                                                                                                                                                            |
|------------------|----------------------------------------------------------------------------------------------------------------------------------------------------------------------------------------------------------------------------------------------------------------------------------------------------------------------------------------------------------------------------------------------------------------------------------------------------------------------------------------------------------------------------------------------------------------------------------------------------------------------------------------------------------------------------------------------------------------------------------------------------------------------------------------------------------------------------------------------------------------------------------------------------------------------------------------------------------------------------|
| Methods          | <ul style="list-style-type: none"> <li>- Retrospective study</li> <li>- Ireland</li> </ul>                                                                                                                                                                                                                                                                                                                                                                                                                                                                                                                                                                                                                                                                                                                                                                                                                                                                                 |
| Participants     | <ul style="list-style-type: none"> <li>- 77 psoriasis on MTX (50 patients (65%) had a valid TE assessment, 70 had analyzed FibroTest results, 51 had serial PIIINP 1 year before TE)</li> <li>- Female 36(46.8)</li> <li>- Age 51(range 22-85)</li> <li>- Psoriasis type; CPP 70(91), palmoplantar pustulosis 7(9)</li> <li>- Psoriatic arthritis 20(26)</li> <li>- BMI 27.7(range 19.8-63.6)</li> <li>- Overweight 50(65)</li> <li>- Obesity 24(31)</li> <li>- Morbid obesity (BMI&gt;40) 2(3)</li> <li>- Alcohol consumption 0.06(0-24) U/wk</li> <li>- DM 4(5)</li> <li>- Current smokers 27(35), Ex-smoker 3(4)</li> <li>- MTX cumulative dose; median 2.6(range 0.13-19.1) g, mean 4.1 g</li> <li>- MTX duration; median 2.8(range 0.3-20.6) years, mean 5.1 years</li> </ul>                                                                                                                                                                                         |
| Investigations   | <ul style="list-style-type: none"> <li>- TE, FibroTest (Fibrosure), serial PIIINP (<math>\geq 3</math> abnormal results in 1 year)</li> <li>- Liver biopsy</li> </ul>                                                                                                                                                                                                                                                                                                                                                                                                                                                                                                                                                                                                                                                                                                                                                                                                      |
| Outcomes         | <ul style="list-style-type: none"> <li>- TE &lt; 7 kPa = 41(82)</li> <li>- FibroTest &lt; 0.31 = 59(84.3)</li> <li>- Serial PIIINP (1 year before TE) &gt; 4.2 = 9/51 (17.6)</li> <li>- Serial PIIINP (1 year before FibroTest) &gt; 4.2 = 3/34 (8.8)</li> <li>- On univariate analysis body mass index (<math>r = 0.40</math>, <math>P = .005</math>) and age (<math>r = 0.52</math>, <math>P = .005</math>) were correlated with abnormal TE results.</li> <li>- Age (<math>r = 0.31</math>, <math>P = .009</math>), cumulative methotrexate dose (<math>r = 0.31</math>, <math>P = .01</math>), and duration of methotrexate therapy (<math>r = 0.36</math>, <math>P = .002</math>) were correlated with abnormal FibroTest results.</li> <li>- Steatosis was demonstrated in all 5 patients who received liver biopsies during the study. Two patients had hepatic fibrosis, with 1 showing a sinusoidal pattern of fibrosis attributed to steatohepatitis.</li> </ul> |
| Comments         |                                                                                                                                                                                                                                                                                                                                                                                                                                                                                                                                                                                                                                                                                                                                                                                                                                                                                                                                                                            |

|                 |                                                                                                                                                                                                                                                                                                                                                                                                                                             |
|-----------------|---------------------------------------------------------------------------------------------------------------------------------------------------------------------------------------------------------------------------------------------------------------------------------------------------------------------------------------------------------------------------------------------------------------------------------------------|
| Bray, 2012 (49) |                                                                                                                                                                                                                                                                                                                                                                                                                                             |
| Methods         | <ul style="list-style-type: none"> <li>- Cross-sectional</li> <li>- United Kingdom</li> </ul>                                                                                                                                                                                                                                                                                                                                               |
| Participants    | <ul style="list-style-type: none"> <li>- 21 psoriasis patients taking MTX (10 had valid TE scans, 7 failed to obtain a valid result)</li> <li>- Age 59 (range 41-83)</li> <li>- Female 9(42.9)</li> <li>- Psoriasis type; chronic plaque 19(90), pustular 1(5), palmoplantar hyperkeratotic 1(5), psoriatic arthritis 7(33)</li> <li>- MTX cumulative dose 4.927 (5.420 range 1.250-18.695) g</li> <li>- BMI 33 kg/m<sup>2</sup></li> </ul> |
| Investigations  | <ul style="list-style-type: none"> <li>- TE</li> </ul>                                                                                                                                                                                                                                                                                                                                                                                      |
| Outcomes        | <ul style="list-style-type: none"> <li>- TE &lt; 8 kPa = 6(60)</li> <li>- TE ≥ 10 kPa = 3(30)</li> <li>- TE ≥ 7.1 kPa = sensitivity 100% (95CI:15.8–100%), specificity 67% (95CI: 29.9–92.5%).</li> </ul>                                                                                                                                                                                                                                   |
| Comments        |                                                                                                                                                                                                                                                                                                                                                                                                                                             |

| Madanagobalane, 2012 (50) |                                                                                                                                                                                                                                                                                                                                                                                                                                                                                                                                                                                                                                                                                                                                                          |
|---------------------------|----------------------------------------------------------------------------------------------------------------------------------------------------------------------------------------------------------------------------------------------------------------------------------------------------------------------------------------------------------------------------------------------------------------------------------------------------------------------------------------------------------------------------------------------------------------------------------------------------------------------------------------------------------------------------------------------------------------------------------------------------------|
| Methods                   | <ul style="list-style-type: none"> <li>- Cross-sectional study</li> <li>- India</li> </ul>                                                                                                                                                                                                                                                                                                                                                                                                                                                                                                                                                                                                                                                               |
| Participants              | <ul style="list-style-type: none"> <li>- 58 psoriasis patients</li> <li>- Age 46.9±1.15</li> <li>- Female 12(20.7)</li> <li>- BMI 32.3±5.2</li> <li>- PASI score 6.5±10.8</li> <li>- Psoriatic arthritis 21 (36.2)</li> <li>- Current smoker 13 (22.4)</li> <li>- Obesity 54 (80)</li> <li>- Metabolic syndrome 49 (84.48)</li> <li>- Abdominal obesity 45 (77.5), 103.4±8.5</li> <li>- Hypercholesterolemia 41 (69.4)</li> <li>- Hypertriglyceridemia 48 (82.7)</li> <li>- Hyperglycemia 42 (72.4)</li> <li>- Hypertension 20 (34.4)</li> <li>- Diabetes 26 (44.8)</li> <li>- Patients on current treatment and those who received cyclosporine, acitretin, psoralens and methotrexate within the last 6 weeks were excluded from the study.</li> </ul> |
| Investigations            | <ul style="list-style-type: none"> <li>- FibroTest</li> </ul>                                                                                                                                                                                                                                                                                                                                                                                                                                                                                                                                                                                                                                                                                            |
| Outcomes                  | <ul style="list-style-type: none"> <li>- FibroTest stage &lt; F2-F3 = 94.9%</li> </ul>                                                                                                                                                                                                                                                                                                                                                                                                                                                                                                                                                                                                                                                                   |
| Comments                  |                                                                                                                                                                                                                                                                                                                                                                                                                                                                                                                                                                                                                                                                                                                                                          |

|                  |                                                                                                                                                                                                                                                                                                                                                                                                                                                                                                                                                       |                                                                                                                                                                                                                                                                                                                                                                                                                                                                                                                                  |
|------------------|-------------------------------------------------------------------------------------------------------------------------------------------------------------------------------------------------------------------------------------------------------------------------------------------------------------------------------------------------------------------------------------------------------------------------------------------------------------------------------------------------------------------------------------------------------|----------------------------------------------------------------------------------------------------------------------------------------------------------------------------------------------------------------------------------------------------------------------------------------------------------------------------------------------------------------------------------------------------------------------------------------------------------------------------------------------------------------------------------|
| Seitz, 2010 (51) |                                                                                                                                                                                                                                                                                                                                                                                                                                                                                                                                                       |                                                                                                                                                                                                                                                                                                                                                                                                                                                                                                                                  |
| Methods          | <ul style="list-style-type: none"> <li>- Prospective, cross-sectional study</li> <li>- Switzerland</li> </ul>                                                                                                                                                                                                                                                                                                                                                                                                                                         |                                                                                                                                                                                                                                                                                                                                                                                                                                                                                                                                  |
| Investigations   | <ul style="list-style-type: none"> <li>- TE</li> </ul>                                                                                                                                                                                                                                                                                                                                                                                                                                                                                                |                                                                                                                                                                                                                                                                                                                                                                                                                                                                                                                                  |
| Participants     | <p>TNF- (N=20)</p> <ul style="list-style-type: none"> <li>- Age 51.9±14.1 years</li> <li>- Female 6(30.0)</li> <li>- BMI 26.4±3.8 kg/m<sup>2</sup></li> <li>- Psoriasis duration 9.5±7.6 years</li> <li>- MTX use 100%</li> <li>- MTX dose/wk 16.1±4.6 mg</li> <li>- MTX cumulative 2.7±2.3 g</li> <li>- Folic cumulative 9.8±5.0 g</li> <li>- Diabetes 3(15.0)</li> <li>- Steatohepatitis 4(20.0)</li> <li>- Dyslipidemia 4(20.0)</li> <li>- Alcohol use 7(35.0) %</li> <li>- Alcohol use 11.3±16.6 g/day</li> <li>- Abnormal LFT 7(35.0)</li> </ul> | <p>TNF+ (N=23)</p> <ul style="list-style-type: none"> <li>- Age 51.3±10.9</li> <li>- Female 7(30.4)</li> <li>- BMI 27.0±4.5</li> <li>- Psoriasis duration 11.8±11.2 years</li> <li>- MTX use 100%</li> <li>- MTX dose/wk 15.4±5.4 mg</li> <li>- MTX cumulative 3.7±3.2 g</li> <li>- Folic cumulative 9.4±3.0 g</li> <li>- Diabetes 3(13.0)</li> <li>- Steatohepatitis 3(13.0)</li> <li>- Dyslipidemia 3(13.0)</li> <li>- Alcohol use 5(21.7) %</li> <li>- Alcohol use 4.3±10.4 g/day</li> <li>- Abnormal LFT 10(43.5)</li> </ul> |
| Outcomes         | <ul style="list-style-type: none"> <li>- TE &lt; 8 kPa = 14(70)</li> </ul>                                                                                                                                                                                                                                                                                                                                                                                                                                                                            | <ul style="list-style-type: none"> <li>- TE &lt; 8 kPa = 22(95.7)</li> </ul>                                                                                                                                                                                                                                                                                                                                                                                                                                                     |
| Comments         |                                                                                                                                                                                                                                                                                                                                                                                                                                                                                                                                                       |                                                                                                                                                                                                                                                                                                                                                                                                                                                                                                                                  |

|                    |                                                                                                                                                                                                                                                                                                                                                                                                                                                                                                  |
|--------------------|--------------------------------------------------------------------------------------------------------------------------------------------------------------------------------------------------------------------------------------------------------------------------------------------------------------------------------------------------------------------------------------------------------------------------------------------------------------------------------------------------|
| Laharie, 2010 (52) |                                                                                                                                                                                                                                                                                                                                                                                                                                                                                                  |
| Methods            | <ul style="list-style-type: none"> <li>- Prospective, case-control study</li> <li>- France</li> </ul>                                                                                                                                                                                                                                                                                                                                                                                            |
| Participants       | <ul style="list-style-type: none"> <li>- 111 psoriasis patients</li> <li>- Female 30(27)</li> <li>- Age 56.2±12.2</li> <li>- BMI 27±4.8 kg/m<sup>2</sup></li> <li>- Diabetes 15(13.5)</li> <li>- Hypertension 34(30.6)</li> <li>- Alcohol use 3(0-16.2)</li> <li>- MetS 25(25.8)</li> <li>- MTX naive 28(25.2)</li> <li>- MTX cumulative dose 1.56(0.48-3) g</li> <li>- MTX dose/wk 110(32-250) mg, 0.110(0.032-0.250) mg</li> <li>- AST 33(22-47) IU/L</li> <li>- GGT 36(21-72) IU/L</li> </ul> |
| Investigations     | <ul style="list-style-type: none"> <li>- TE, liver biopsy</li> </ul>                                                                                                                                                                                                                                                                                                                                                                                                                             |
| Outcomes           | <ul style="list-style-type: none"> <li>- TE &lt;7.9 kPa = 99(89.2)</li> <li>- 6 of 12 was biopsied</li> </ul>                                                                                                                                                                                                                                                                                                                                                                                    |
| Comments           |                                                                                                                                                                                                                                                                                                                                                                                                                                                                                                  |

| Lindsay, 2009 (56) |                                                                                                                                                                                                                                                                                                                                                                                                                                                                              |
|--------------------|------------------------------------------------------------------------------------------------------------------------------------------------------------------------------------------------------------------------------------------------------------------------------------------------------------------------------------------------------------------------------------------------------------------------------------------------------------------------------|
| Methods            | <ul style="list-style-type: none"> <li>- Prospective study</li> <li>- United Kingdom</li> </ul>                                                                                                                                                                                                                                                                                                                                                                              |
| Participants       | <ul style="list-style-type: none"> <li>- 54 patients with psoriasis (48 with PIIINP results)</li> <li>- Mean age 54.4±11 years</li> <li>- Psoriatic arthritis 47/54(87%)</li> <li>- Psoriasis duration 27.3±15 years</li> <li>- Arthritis duration 18.6 ± 13 years</li> <li>- Mean MTX treatment duration 6.9±4.22 years</li> <li>- Mean MTX weekly dose of 0.0155 ± 0.00617 g, 15.5 ± 6.17 mg</li> <li>- Mean MTX cumulative dose of 4.396±3.140 g, 4396±3140 mg</li> </ul> |
| Investigations     | <ul style="list-style-type: none"> <li>- PIIINP</li> <li>- Liver biopsy</li> </ul>                                                                                                                                                                                                                                                                                                                                                                                           |
| Outcomes           | <ul style="list-style-type: none"> <li>- elevated PIIINP = 16 (33.3)</li> <li>- no cases of advanced fibrosis or of cirrhosis and mild early fibrosis in 11 (22%) patients</li> <li>- 4 of those with early fibrosis had a normal PIIINP on the day of their liver biopsy; in seven patients it was elevated</li> </ul>                                                                                                                                                      |
| Comments           |                                                                                                                                                                                                                                                                                                                                                                                                                                                                              |



| Berends, 2007 (66) |                                                                                                                                                                                                                                                                                                                                                                                                                                                                                                                                                                                                                             |
|--------------------|-----------------------------------------------------------------------------------------------------------------------------------------------------------------------------------------------------------------------------------------------------------------------------------------------------------------------------------------------------------------------------------------------------------------------------------------------------------------------------------------------------------------------------------------------------------------------------------------------------------------------------|
| Methods            | - Netherlands                                                                                                                                                                                                                                                                                                                                                                                                                                                                                                                                                                                                               |
| Participants       | <ul style="list-style-type: none"> <li>- 24 psoriasis patients who had a recent liver biopsy during MTX use</li> <li>- Female 13 (54.2)</li> <li>- Age 55 (range 34–73) years</li> <li>- BMI 26 (20–38) kg/m<sup>2</sup></li> <li>- Diabetes 4 (17)</li> <li>- MTX cumulative dose 3.352 (0.314–20.235) g</li> <li>- MTX cumulative dose &gt; 5g 4(16.7)</li> </ul>                                                                                                                                                                                                                                                         |
| Investigations     | <ul style="list-style-type: none"> <li>- Fibroscan</li> <li>- FibroTest</li> <li>- Liver biopsy</li> </ul>                                                                                                                                                                                                                                                                                                                                                                                                                                                                                                                  |
| Outcomes           | <ul style="list-style-type: none"> <li>- TE &gt;7.1 kPa [Metavir ≥F2] = sensitivity 50%, specificity 88%, accuracy 70%, PPV 33%, NPV 86%</li> <li>- FibroTest &gt;0.31 [Metavir ≥F2] = sensitivity 83%, specificity 61%, accuracy 67%, PPV 42%, NPV 92%</li> <li>- Fibroscan values (n=20) ranged between 3.3 and 18.4 kPa (median value 6.4 kPa) and correctly identified 88% of the patients without significant liver fibrosis (Metavir score &lt; F2, Fibroscans ≤ 7.1 kPa).</li> <li>- The Fibrotest identified 83% of the patients with significant liver fibrosis (Metavir score &lt;F2, Fibrotest ≥0.31)</li> </ul> |
| Comments           |                                                                                                                                                                                                                                                                                                                                                                                                                                                                                                                                                                                                                             |

|                 |                                                                                                                                                                                                                                                                                                                                                                                                                                                                                                                           |
|-----------------|---------------------------------------------------------------------------------------------------------------------------------------------------------------------------------------------------------------------------------------------------------------------------------------------------------------------------------------------------------------------------------------------------------------------------------------------------------------------------------------------------------------------------|
| Khan, 2006 (64) |                                                                                                                                                                                                                                                                                                                                                                                                                                                                                                                           |
| Methods         | <ul style="list-style-type: none"> <li>- Retrospective</li> <li>- United Kingdom</li> </ul>                                                                                                                                                                                                                                                                                                                                                                                                                               |
| Participants    | <ul style="list-style-type: none"> <li>- 65 patients with moderate to severe psoriasis receiving MTX</li> <li>- 15 patients had a total of 30 biopsies (Liver biopsies were performed according to guidelines with three abnormal (&gt;4.2 ug/l) results in 12 months.</li> <li>- Age 56.4 ± 12.8, female 7 (46.7%)</li> <li>- Total number of MTX years was 278.9 with a follow up period of 1–14 years with a mean duration of 4.3 (SD 3.9) years.</li> <li>- Mean cumulative dose of MTX 2.000 (SD 1.838) g</li> </ul> |
| Investigations  | <ul style="list-style-type: none"> <li>- PIIINP</li> </ul>                                                                                                                                                                                                                                                                                                                                                                                                                                                                |
| Outcomes        | <ul style="list-style-type: none"> <li>- 174 P3NP assays and 30 liver biopsies were recorded.</li> <li>- 16 P3NP estimations (28%)—that is, value &gt;4.2 ug/l of a total of 58 correlated at some stage with an abnormal liver biopsy.</li> <li>- Most (11, 73.3%) of them had either normal biopsy findings or mild to moderate steatosis</li> </ul>                                                                                                                                                                    |
| Comments        |                                                                                                                                                                                                                                                                                                                                                                                                                                                                                                                           |

| Zachariae, 2001 (57) |                                                                                                                                                                                                                                                                                                                                                                                                                                                                                                                                                                                                                                                                                                                                                                                                                                                                           |
|----------------------|---------------------------------------------------------------------------------------------------------------------------------------------------------------------------------------------------------------------------------------------------------------------------------------------------------------------------------------------------------------------------------------------------------------------------------------------------------------------------------------------------------------------------------------------------------------------------------------------------------------------------------------------------------------------------------------------------------------------------------------------------------------------------------------------------------------------------------------------------------------------------|
| Methods              | <ul style="list-style-type: none"> <li>- Retrospective study</li> <li>- Denmark</li> </ul>                                                                                                                                                                                                                                                                                                                                                                                                                                                                                                                                                                                                                                                                                                                                                                                |
| Participants         | <ul style="list-style-type: none"> <li>- 70 patients with psoriasis, who were on MTX and had both a liver biopsy without fibrosis and a normal PIIINP</li> <li>- The follow-up time was from 1 to 11 years.</li> </ul>                                                                                                                                                                                                                                                                                                                                                                                                                                                                                                                                                                                                                                                    |
| Investigations       | <ul style="list-style-type: none"> <li>- PIIINP</li> <li>- Liver biopsy</li> </ul>                                                                                                                                                                                                                                                                                                                                                                                                                                                                                                                                                                                                                                                                                                                                                                                        |
| Outcomes             | <ul style="list-style-type: none"> <li>- PIIINP &gt; 4.2 µg/L = 6(8.6)</li> <li>- A total of 189 liver biopsies and 329 analyses of PIIINP were recorded.</li> <li>- 21 patients had only one and no further biopsies, but their data included at least two to three PIIINP samples obtained within a year around the time of the biopsy, and at least two were taken either prior to or at the time of the biopsy.</li> <li>- 49 patients had from 2 to 7 liver biopsies each and a total of 267 analyses of PIIINP.</li> <li>- 4 patients developed fibrosis of the liver as shown by liver biopsies, and all of these patients developed elevated serum PIIINP levels.</li> <li>- 2 further patients had elevated PIIINP, but normal liver biopsy.</li> <li>- Thus, no liver fibrosis was missed in the 63 patients with consistently normal PIIINP levels.</li> </ul> |
| Comments             |                                                                                                                                                                                                                                                                                                                                                                                                                                                                                                                                                                                                                                                                                                                                                                                                                                                                           |

|                      |                                                                                                                                                                                                                     |
|----------------------|---------------------------------------------------------------------------------------------------------------------------------------------------------------------------------------------------------------------|
| Zachariae, 1996 (59) |                                                                                                                                                                                                                     |
| Methods              | - Denmark                                                                                                                                                                                                           |
| Participants         | - The investigations were carried out on 186 liver biopsies and 5 autopsies.<br>- 11 surviving psoriasis patients were also studied by analysis of serum aminoterminal propeptide of type III procollagen (PIIINP), |
| Investigations       | - PIIINP<br>- Liver biopsy                                                                                                                                                                                          |
| Outcomes             | - PIIINP > 4.2 µg/L = 0(0)                                                                                                                                                                                          |
| Comments             |                                                                                                                                                                                                                     |

|                  |                                                                                 |
|------------------|---------------------------------------------------------------------------------|
| Boffa, 1996 (60) |                                                                                 |
| Methods          | - United Kingdom                                                                |
| Participants     | - 87 patients receiving long-term MTX treatment for severe psoriasis.           |
| Investigations   | - PIIINP                                                                        |
| Outcomes         | - PIIINP-O > 4.2 µg/L = 41(47.1)<br>- PIIINP-O Sensitivity 81%, specificity 62% |
| Comments         |                                                                                 |

|                    |                                                                                                                                                                                                                                                                                                                                        |
|--------------------|----------------------------------------------------------------------------------------------------------------------------------------------------------------------------------------------------------------------------------------------------------------------------------------------------------------------------------------|
| Oogarah, 1995 (63) |                                                                                                                                                                                                                                                                                                                                        |
| Methods            | - United Kingdom                                                                                                                                                                                                                                                                                                                       |
| Participants       | <ul style="list-style-type: none"> <li>- 22 psoriasis patients</li> <li>- Female 8 (36.4%)</li> <li>- Mean age 42.6 (22-72) years</li> <li>- Duration of treatment 188.5(35-738) weeks</li> <li>- The total cumulative dose of MTX 1.901 (0.395-5.645) g</li> </ul>                                                                    |
| Investigations     | <ul style="list-style-type: none"> <li>- PIIINP</li> <li>- Liver biopsy</li> </ul>                                                                                                                                                                                                                                                     |
| Outcomes           | <ul style="list-style-type: none"> <li>- Elevated P3NP levels were found in 6 of 11 (54.5) patients with the first assay (P3NP<sub>1</sub>)</li> <li>- Elevated P3NP levels were found in 4 of 22 (18.2) patients with the second assay (P3NP<sub>2</sub>)</li> <li>- Only two patients had raised levels with both assays.</li> </ul> |
| Comments           | - 11 of the patients were included in Mitchell 1990, and thus was not included in the quantitative analysis                                                                                                                                                                                                                            |

|                      |                                                                                                                                                                                                                                                                                                                                                                                                                                    |
|----------------------|------------------------------------------------------------------------------------------------------------------------------------------------------------------------------------------------------------------------------------------------------------------------------------------------------------------------------------------------------------------------------------------------------------------------------------|
| Zachariae, 1991 (58) |                                                                                                                                                                                                                                                                                                                                                                                                                                    |
| Methods              | - Denmark                                                                                                                                                                                                                                                                                                                                                                                                                          |
| Participants         | - 170 patients with psoriasis; 83 (48.8%) had PsA<br>- who had liver biopsies performed during or before treatment with methotrexate or, in some cases, with retinoids.                                                                                                                                                                                                                                                            |
| Investigations       | - PIIINP<br>- Liver biopsy                                                                                                                                                                                                                                                                                                                                                                                                         |
| Outcomes             | - Psoriasis patients with fibrosis or cirrhosis in their liver biopsy specimens had a significantly higher mean serum P3NP than did patients without fibrosis and without arthritis.<br>- PIIINP > 4.3 µg/L = 24(21.8); 2 of 52 (3.85%) of patients without cirrhosis or fibrosis and no arthritis had an elevated P3NP, 22 of 58 (37.93%) of patients with PsA had an increased P3NP in the absence of detectable liver fibrosis. |
| Comments             |                                                                                                                                                                                                                                                                                                                                                                                                                                    |

|                     |                                                                                                                                                                                                                                                                                                                                                                                                                           |
|---------------------|---------------------------------------------------------------------------------------------------------------------------------------------------------------------------------------------------------------------------------------------------------------------------------------------------------------------------------------------------------------------------------------------------------------------------|
| Mitchell, 1990 (61) |                                                                                                                                                                                                                                                                                                                                                                                                                           |
| Methods             | - United Kingdom                                                                                                                                                                                                                                                                                                                                                                                                          |
| Participants        | <ul style="list-style-type: none"> <li>- 51 patients with severe psoriasis</li> <li>- Age 47 (range 22-69) years</li> <li>- Duration of MTX treatment 5.2 (1-13) years</li> <li>- Oral MTX cumulative dose 2.538 (0.545-10.024) g</li> <li>- control group; 18 healthy patients with non-inflammatory skin disorders, and 18 active psoriasis patients who had never received systemic treatment for psoriasis</li> </ul> |
| Investigations      | - PIIINP (referece range 2.0-11.8 µg/L)                                                                                                                                                                                                                                                                                                                                                                                   |
| Outcomes            | <ul style="list-style-type: none"> <li>- PIIINP &gt; 11.8 µg/L = 35(68.6)</li> <li>- The normal reference range for serum levels of P3NP quoted by the assay manufacturers is 4-12 ng/ml. None of the subjects in the normal or psoriatic control groups had elevated serum P3NP levels (range 2.0-11.8 µg/L)</li> </ul>                                                                                                  |
| Comments            |                                                                                                                                                                                                                                                                                                                                                                                                                           |



|                    |                                                                                                                                                                                                                            |
|--------------------|----------------------------------------------------------------------------------------------------------------------------------------------------------------------------------------------------------------------------|
| Risteli, 1988 (62) |                                                                                                                                                                                                                            |
| Methods            | - Denmark                                                                                                                                                                                                                  |
| Participants       | - 24 patients with psoriasis and on methotrexate<br>- Female 10 (41.7)<br>- Age 50 (32-75) years                                                                                                                           |
| Investigations     | - PIIINP<br>- Liver biopsy                                                                                                                                                                                                 |
| Outcomes           | - PIIINP > 4.2 µg/L = 8(33.3); 8 of 9 patients had abnormal PIIINP level, and all 9 had abnormal liver biopsy. 15 patients that had normal level of PIIINP; 9 had normal liver biopsies, and 2 had minimal liver fibrosis. |
| Comments           |                                                                                                                                                                                                                            |
