# Supplementary material for: Liver fibrosis prevalence and risk factors in patients with psoriasis: A systematic review and meta-analysis
Source: PubMed Central journal article supplement (PMC9797863; doi:10.3389/fmed.2022.1068157), 2022-12-15
Supplement: Table_3.pdf [file Table_3.pdf]

**Supplementary Table 3: Formulae of non-invasive tests**

|                                            |                                                                                                                                                                                                                                                                                                             |
|--------------------------------------------|-------------------------------------------------------------------------------------------------------------------------------------------------------------------------------------------------------------------------------------------------------------------------------------------------------------|
| <b>Fibrosis-4 (FIB-4) index</b>            | $(\text{Age}[\text{years}] \times \text{AST}[\text{U/L}]) / (\text{platelet count} [\times 10^9/\text{L}] \times \sqrt{\text{ALT}[\text{U/L}]})$                                                                                                                                                            |
| <b>AST to Platelet Ratio Index (APRI)</b>  | $[(\text{AST}/\text{upper limit of the normal AST range}) \times 100]/\text{platelet count} [\times 10^9/\text{L}]$                                                                                                                                                                                         |
| <b>NAFLD fibrosis score (NFS)</b>          | $-1.675 + 0.037 \times \text{age (years)} + 0.094 \times \text{BMI (kg/m}^2) + 1.13 \times \text{diabetes (yes = 1, no = 0)} + 0.99 \times \text{AST/ALT ratio} - 0.013 \times \text{platelet count} (\times 10^9/\text{L}) - 0.66 \times \text{albumin (g/dL)}$                                            |
| <b>FibroSure/FibroTest</b>                 | $4467 \times \log [\alpha 2\text{-macroglobulin (gr/l)}] - 1357 \times \log [\text{haptoglobin (gr/l)}] + 0.0821 \times [\text{age (years)}] + 1737 \times \log [\text{bilirubin } (\mu\text{mol/l)}] - 1184 \times [\text{apolipoprotein A1 (gr/l)}] + 0.301 \times \text{sex (male=1, female=0)} - 5.054$ |
| <b>Enhanced Liver Fibrosis score (ELF)</b> | $2.494 + 0.846 \ln(\text{CHA}) + 0.735 \ln(\text{CPIIINP}) + 0.391 \ln(\text{CTIMP-1})$ ; amino-terminal propeptide of type III procollagen (PIIINP), tissue inhibitor of matrix metalloproteinase 1 (TIMP-1) and hyaluronic acid (HA)                                                                      |
| <b>Forns Index</b>                         | $7.811 - 3.131 \times \ln(\text{platelet count}) + 0.781 \times \ln(\text{GGT}) + 3.467 \times \ln(\text{age}) - 0.014 \times (\text{cholesterol})$                                                                                                                                                         |
| <b>FibroMeter NAFLD</b>                    | $0.4184 \text{ glucose (mmol/l)} + 0.0701 \text{ AST (IU/l)} + 0.0008 \text{ ferritin } (\mu\text{g/l}) - 0.0102 \text{ platelet (G/l)} - 0.0260 \text{ ALT (UI/l)} + 0.0459 \text{ body weight (kg)} + 0.0842 \text{ age (yr)} + 11.6226$                                                                  |
| <b>Hepascore</b>                           | $y/(1 + y)$ , where $y = \exp (-4.185818 - 0.0249 \times \text{age}(\text{years}) + 0.7464 \times \text{gender (male = 1, female = 0)} + 1.0039 \times \alpha 2\text{-macroglobulin} + 0.0302 \times \text{hyaluronic acid} + 0.0691 \times \text{bilirubin}$                                               |
| <b>Fibrosis Probability Index (FPI)</b>    | $10.929 + (1.827 \times \text{Ln AST}) + (0.081 \times \text{age}) + (0.768 \times \text{past alcohol use}) + (0.385 \times \text{HOMA-IR}) - (0.447 \times \text{cholesterol})$                                                                                                                            |
