# Supplementary material for: Liver fibrosis prevalence and risk factors in patients with psoriasis: A systematic review and meta-analysis
Source: PubMed Central journal article supplement (PMC9797863; doi:10.3389/fmed.2022.1068157), 2022-12-15
Supplement: Table_4.pdf [file Table_4.pdf]

**Supplementary Table 4:** Summary of meta-regression analysis for pooled prevalence of high risk and low risk of advanced liver fibrosis, respectively.

| Variables           | $\beta$  | SE      | z     | p-value | 95%CI    |         |
|---------------------|----------|---------|-------|---------|----------|---------|
|                     |          |         |       |         | LCI      | UCI     |
| N                   | 0.01122  | 0.02369 | 0.47  | 0.636   | -0.03520 | 0.05765 |
| Age                 | 0.11734  | 0.43259 | 0.27  | 0.786   | -0.73052 | 0.96521 |
| Female proportion   | -0.04602 | 0.2096  | -0.22 | 0.826   | -0.45683 | 0.36480 |
| BMI                 | 1.53033  | 1.1183  | 1.37  | 0.171   | -0.66150 | 3.72216 |
| Obesity proportion  | 0.29904  | 0.17633 | 1.70  | 0.090   | -0.04655 | 0.64463 |
| Psoriasis duration  | 0.20335  | 0.47688 | 0.43  | 0.670   | -0.73132 | 1.13802 |
| PASI                | -0.3461  | 0.68818 | -0.50 | 0.615   | -1.69491 | 1.00270 |
| MTX user proportion | 0.0004   | 0.0006  | 0.66  | 0.507   | -0.07877 | 0.15831 |
| DM proportion       | -0.04645 | 0.25981 | -0.18 | 0.858   | -0.55567 | 0.46278 |
| HT proportion       | -0.00019 | 0.14857 | -0.00 | 0.999   | -0.29138 | 0.29101 |
| DLP proportion      | 0.0794   | 0.17499 | 0.45  | 0.650   | -0.26356 | 0.42237 |

| Variables           | $\beta$  | SE      | z     | p-value | 95%CI    |         |
|---------------------|----------|---------|-------|---------|----------|---------|
|                     |          |         |       |         | LCI      | UCI     |
| N                   | 0.00566  | 0.01874 | 0.30  | 0.763   | -0.03107 | 0.04238 |
| Age                 | -0.32552 | 0.31215 | -1.04 | 0.297   | -0.93733 | 0.28628 |
| Female proportion   | -0.14755 | 0.18902 | -0.78 | 0.435   | -0.51802 | 0.22292 |
| BMI                 | -0.19998 | 0.43024 | -0.46 | 0.642   | -1.04324 | 0.64328 |
| Obesity proportion  | -0.13019 | 0.12437 | -1.05 | 0.295   | -0.37395 | 0.11358 |
| Psoriasis duration  | -0.86971 | 0.4862  | -1.79 | 0.074   | -1.82264 | 0.08323 |
| PASI                | -0.86466 | 0.60412 | -1.43 | 0.152   | -2.04870 | 0.31938 |
| PsA proportion      | -0.10206 | 0.20558 | -0.50 | 0.620   | -0.50500 | 0.30088 |
| MTX user proportion | -0.07245 | 0.05685 | -1.27 | 0.203   | -0.18388 | 0.03898 |
| MTX cumulative dose | -2.95996 | 3.11586 | -0.95 | 0.342   | -9.06693 | 3.14702 |
| DM proportion       | -0.00509 | 0.25306 | -0.02 | 0.984   | -0.50108 | 0.49089 |
| DLP proportion      | 0.15152  | 0.14602 | 1.04  | 0.299   | -0.13468 | 0.43772 |
| MetS proportion     | 0.07454  | 0.36615 | 0.20  | 0.839   | -0.64311 | 0.79219 |
