# Supplementary material for: Liver fibrosis prevalence and risk factors in patients with psoriasis: A systematic review and meta-analysis
Source: PubMed Central journal article supplement (PMC9797863; doi:10.3389/fmed.2022.1068157), 2022-12-15
Supplement: Table_5.pdf [file Table_5.pdf]

**Supplementary Table 5:** The quality assessment of studies included in the systematic review

| First author, year          | Selection                |                   |                                       |                                | Comparability of the study population (0-2) | Outcome assessment (0-1) | Statistical test (0-1) | Total score (0-9) |
|-----------------------------|--------------------------|-------------------|---------------------------------------|--------------------------------|---------------------------------------------|--------------------------|------------------------|-------------------|
|                             | Representativeness (0-1) | Sample size (0-1) | Fibrosis as outcome of interest (0-1) | Fibrosis assessment tool (0-2) |                                             |                          |                        |                   |
| Lee, 2022 (27)              | 1                        | 1                 | 1                                     | 2                              | 2                                           | 1                        | 1                      | 9                 |
| Mahajan, 2022 (30)          | 1                        | 1                 | 1                                     | 2                              | 2                                           | 1                        | 1                      | 9                 |
| Takamura, 2022 (28)         | 1                        | 1                 | 1                                     | 2                              | 2                                           | 1                        | 1                      | 9                 |
| Rattanakaemakorn, 2021 (31) | 1                        | 1                 | 1                                     | 2                              | 2                                           | 1                        | 1                      | 9                 |
| Belinchón-Romero, 2021 (32) | 1                        | 1                 | 1                                     | 2                              | 2                                           | 1                        | 1                      | 9                 |
| Brunner, 2021 (33)          | 1                        | 1                 | 1                                     | 2                              | 2                                           | 1                        | 1                      | 9                 |
| Cervoni, 2020 (34)          | 1                        | 1                 | 1                                     | 2                              | 2                                           | 1                        | 1                      | 9                 |
| Yim, 2020 (19)              | 1                        | 1                 | 1                                     | 2                              | 1                                           | 1                        | 1                      | 8                 |
| Rivera2020 , (35)           | 1                        | 1                 | 1                                     | 2                              | 2                                           | 1                        | 1                      | 9                 |
| Koch, 2020 (36)             | 1                        | 1                 | 1                                     | 2                              | 2                                           | 1                        | 1                      | 9                 |
| Mahajan, 2020 (29)          | 1                        | 1                 | 1                                     | 2                              | 2                                           | 1                        | 1                      | 9                 |
| Magdaleno-Tapial, 2020 (37) | 1                        | 1                 | 1                                     | 2                              | 2                                           | 1                        | 1                      | 9                 |
| Kumar, 2020 (38)            | 1                        | 1                 | 1                                     | 2                              | 1                                           | 1                        | 1                      | 8                 |

| First author, year        | Selection                |                   |                                       |                                | Comparability of the study population (0-2) | Outcome assessment (0-1) | Statistical test (0-1) | Total score (0-9) |
|---------------------------|--------------------------|-------------------|---------------------------------------|--------------------------------|---------------------------------------------|--------------------------|------------------------|-------------------|
|                           | Representativeness (0-1) | Sample size (0-1) | Fibrosis as outcome of interest (0-1) | Fibrosis assessment tool (0-2) |                                             |                          |                        |                   |
| Neema, 2020 (39)          | 1                        | 1                 | 1                                     | 2                              | 2                                           | 1                        | 1                      | 9                 |
| Ortolan, 2019 (40)        | 1                        | 1                 | 1                                     | 2                              | 2                                           | 1                        | 1                      | 9                 |
| BenLagha, 2019 (41)       | 1                        | 1                 | 1                                     | 2                              | 2                                           | 1                        | 1                      | 9                 |
| Maybury, 2019 (42)        | 1                        | 1                 | 1                                     | 2                              | 2                                           | 1                        | 1                      | 9                 |
| vandenReek, 2017 (55)     | 1                        | 1                 | 1                                     | 1                              | 1                                           | 1                        | 1                      | 7                 |
| vanderVoort, 2017 (54)    | 1                        | 1                 | 1                                     | 2                              | 2                                           | 1                        | 1                      | 9                 |
| Bauer, 2017 (43)          | 1                        | 1                 | 1                                     | 2                              | 2                                           | 1                        | 1                      | 9                 |
| Talme, 2017 (44)          | 1                        | 1                 | 1                                     | 2                              | 2                                           | 1                        | 1                      | 9                 |
| Rongngern, 2017 (45)      | 1                        | 1                 | 1                                     | 2                              | 2                                           | 1                        | 1                      | 9                 |
| Pongpit, 2016 (46)        | 1                        | 1                 | 1                                     | 2                              | 2                                           | 1                        | 1                      | 9                 |
| Gisondi, 2016 (47)        | 1                        | 1                 | 1                                     | 2                              | 2                                           | 1                        | 1                      | 9                 |
| vanderVoort, 2016 (53)    | 1                        | 1                 | 1                                     | 2                              | 2                                           | 1                        | 1                      | 9                 |
| Martyn-Simmons, 2014 (65) | 1                        | 1                 | 1                                     | 2                              | 1                                           | 1                        | 1                      | 8                 |
| Lynch, 2014 (48)          | 1                        | 1                 | 1                                     | 2                              | 2                                           | 1                        | 1                      | 9                 |

| First author, year        | Selection                |                   |                                       |                                | Comparability of the study population (0-2) | Outcome assessment (0-1) | Statistical test (0-1) | Total score (0-9) |
|---------------------------|--------------------------|-------------------|---------------------------------------|--------------------------------|---------------------------------------------|--------------------------|------------------------|-------------------|
|                           | Representativeness (0-1) | Sample size (0-1) | Fibrosis as outcome of interest (0-1) | Fibrosis assessment tool (0-2) |                                             |                          |                        |                   |
| Bray, 2012 (49)           | 1                        | 0                 | 1                                     | 2                              | 2                                           | 1                        | 1                      | 8                 |
| Madanagobalane, 2012 (50) | 1                        | 1                 | 1                                     | 2                              | 2                                           | 1                        | 1                      | 9                 |
| Seitz, 2010 (51)          | 1                        | 1                 | 1                                     | 2                              | 2                                           | 1                        | 1                      | 9                 |
| Laharie, 2010 (52)        | 1                        | 1                 | 1                                     | 2                              | 2                                           | 1                        | 1                      | 9                 |
| Lindsay, 2009 (56)        | 1                        | 1                 | 1                                     | 1                              | 1                                           | 1                        | 1                      | 7                 |
| Berends, 2007 (66)        | 1                        | 0                 | 1                                     | 2                              | 2                                           | 1                        | 1                      | 8                 |
| Khan, 2006 (64)           | 1                        | 1                 | 1                                     | 1                              | 0                                           | 1                        | 0                      | 5                 |
| Zachariae, 2001 (57)      | 1                        | 1                 | 1                                     | 1                              | 0                                           | 1                        | 0                      | 5                 |
| Zachariae, 1996 (59)      | 1                        | 0                 | 1                                     | 1                              | 0                                           | 1                        | 0                      | 4                 |
| Boffa, 1996 (60)          | 1                        | 1                 | 1                                     | 1                              | 0                                           | 1                        | 1                      | 6                 |
| Oogarah, 1995 (63)        | 1                        | 0                 | 1                                     | 1                              | 1                                           | 1                        | 0                      | 5                 |
| Zachariae, 1991 (58)      | 1                        | 1                 | 1                                     | 1                              | 0                                           | 1                        | 1                      | 6                 |
| Mitchell, 1990 (61)       | 1                        | 1                 | 1                                     | 1                              | 1                                           | 1                        | 1                      | 7                 |
| Risteli1988 , (62)        | 1                        | 0                 | 1                                     | 1                              | 1                                           | 1                        | 0                      | 5                 |
